# Supplementary material for: Cardiovascular Events Among Survivors of Sepsis Hospitalization: A Retrospective Cohort Analysis
Source: PubMed Central journal article supplement — J Am Heart Assoc. 2023 Feb 1;12(3):e027813. doi: 10.1161/JAHA.122.027813 (PMC9973620; doi:10.1161/jaha.122.027813), 2023-02-01

# **SUPPLEMENTAL MATERIAL**

**Table S1.** Cardiovascular Disease (CVD) based on hospital discharge International Classification of Disease 9<sup>th</sup> and 10<sup>th</sup> Revisions Clinical Modification (ICD-9/10) codes.

A. Pre-existing CVD

| <b>CVD diagnosis</b> | <b>ICD-9 diagnosis codes</b>                                                                                                                   | <b>ICD-10 diagnosis codes</b>                                                                                                                                   | <b>ICD-9 procedure codes</b> | <b>ICD-10 procedure codes</b> |
|----------------------|------------------------------------------------------------------------------------------------------------------------------------------------|-----------------------------------------------------------------------------------------------------------------------------------------------------------------|------------------------------|-------------------------------|
| Prior MI             | 410.xx, 412.xx                                                                                                                                 | I21.xx, I22.xx,<br>I23.xx, I25.2x                                                                                                                               | --                           | --                            |
| CAD                  | 410.xx-414.xx,<br>429.2                                                                                                                        | I20.xx-I25.xx                                                                                                                                                   | --                           | --                            |
| Heart failure        | 428.x, 402.x1,<br>404.x1, 404.x3,<br>398.91                                                                                                    | I50.x, I97.13x,<br>I11.0, I13.0,<br>I13.2, I09.81                                                                                                               | --                           | --                            |
| Cardiomyopathy       | 425.1x, 425.4,<br>425.5, 425.7,<br>425.8, 425.9,<br>674.5x                                                                                     | B33.24, E88.89,<br>F10.988, I25.5,<br>I42.1, I42.2,<br>I42.6, I42.7,<br>I42.8, I42.9, I43,<br>O90.3                                                             | --                           | --                            |
| HTN                  | 401.xx-405.xx                                                                                                                                  | I10.xx-I15.xx                                                                                                                                                   | --                           | --                            |
| CKD                  | 403.01, 403.11,<br>403.91, 404.02,<br>404.03, 404.12,<br>404.13, 404.92,<br>404.93, 585.3,<br>585.4, 585.5,<br>585.6, 792.5,<br>996.81, V56.xx | T81.502x,<br>T81.512x,<br>T81.522x,<br>T81.532x,<br>T81.592x,<br>T85.611x,<br>T85.621x,<br>T85.631x,<br>T85.691x,<br>T85.71x, I12.0,<br>I13.11, I13.2,<br>I95.3 | --                           | --                            |

|                                                                                                                                        |                                                                                                 |                                                                                                       |    |    |
|----------------------------------------------------------------------------------------------------------------------------------------|-------------------------------------------------------------------------------------------------|-------------------------------------------------------------------------------------------------------|----|----|
|                                                                                                                                        |                                                                                                 | N18.3, N18.4,<br>N18.5, N18.6,<br>R88.0, T86.1x,<br>Y84.1, Z48.22,<br>Z49.xx, Z91.15,<br>Z94.0, Z99.2 |    |    |
| SVT                                                                                                                                    | 427.0                                                                                           | I47.1                                                                                                 | -- | -- |
| Atrial<br>fibrillation/flutter                                                                                                         | 427.3x                                                                                          | I48.x                                                                                                 | -- | -- |
| VT                                                                                                                                     | 427.1, 427.4x,<br>427.5                                                                         | I46.2, I46.8,<br>I46.9, I47.0,<br>I47.2, I49.0x                                                       | -- | -- |
| Hyperlipidemia                                                                                                                         | 272.0, 272.1,<br>272.2, 272.4                                                                   | E78.0x, E78.1,<br>E78.2, E78.4,<br>E78.5                                                              | -- | -- |
| Obesity                                                                                                                                | 278.00, 278.01,<br>278.03, V85.3x,<br>V85.4x                                                    | E66.1, E66.2,<br>E66.8, E66.9,<br>E66.0x, Z68.3x,<br>Z68.4x                                           | -- | -- |
| Diabetes mellitus<br>(Defined as either 2<br>outpatient visits with<br>diagnoses codes or 1<br>inpatient stay with<br>diagnoses codes) | 250.xx, 362.0x,<br>357.2, 366.41                                                                | E08.xx, E09.xx,<br>E10.xx, E11.xx,<br>E13.xx                                                          | -- | -- |
| Stroke                                                                                                                                 | 433.01, 433.11,<br>433.21, 433.31,<br>433.81, 433.91,<br>434.01, 434.11,<br>434.91, 436,<br>444 | I63.x, I74.x                                                                                          | -- | -- |

|                            |                                              |                                                                 |                                                                                                                                                                                                                   |                                                             |
|----------------------------|----------------------------------------------|-----------------------------------------------------------------|-------------------------------------------------------------------------------------------------------------------------------------------------------------------------------------------------------------------|-------------------------------------------------------------|
| Prior PCI                  | V45.82                                       | Z98.61, Z95.5                                                   | 00.66, 36.0x<br><br>CPT codes:<br>92920, 92921,<br>92924, 92925,<br>92928, 92929,<br>92933, 92934,<br>92937, 92938,<br>92941, 92943,<br>92944, 92980,<br>92981, 92982,<br>92984, 92995,<br>92996, 92975,<br>92977 | 0270x, 0271x,<br>0272x, 0273x,<br>02C0, 02C1,<br>02C2, 02C3 |
| Prior CABG                 | V45.81, 414.02,<br>414.03, 414.04,<br>414.05 | I25.810, I25.812,<br>Z95.1, T82.21,<br>I25.7x except<br>I25.75x | 36.1x<br><br>CPT codes:<br>33510, 33511,<br>33512, 33513,<br>33514, 33516,<br>33517, 33518,<br>33519, 33521,<br>33522, 33523,<br>33533, 33534,<br>33535, 33536<br><br>HCPC: 4110F                                 | 02100x, 02110x,<br>02120x, 02130x                           |
| Prior valve<br>replacement | --                                           | --                                                              | 35.24, 35.22,<br>35.26, 35.28,<br>35.23, 35.21,<br>35.25, 35.27,                                                                                                                                                  | 02RG0JZ,<br>02RF0JZ,<br>02RH0JZ,                            |

|  |  |  |                                                                                                                                                                                                                                                                                                                                                                                                                                                                                                                              |                                                                                                                                                                                                                                                                                                                                                                                              |
|--|--|--|------------------------------------------------------------------------------------------------------------------------------------------------------------------------------------------------------------------------------------------------------------------------------------------------------------------------------------------------------------------------------------------------------------------------------------------------------------------------------------------------------------------------------|----------------------------------------------------------------------------------------------------------------------------------------------------------------------------------------------------------------------------------------------------------------------------------------------------------------------------------------------------------------------------------------------|
|  |  |  | 35.12, 35.11,<br>35.13, 35.14,<br>35.33, 35.05,<br>35.06, 35.07,<br>35.08, 35.09,<br>35.96, 35.97,<br>35.00, 35.01,<br>35.02, 35.03,<br>35.04<br><br>CPT codes:<br>33405, 33430,<br>33406, 33410,<br>33411, 33412,<br>33413, 33465,<br>33475, 33422,<br>33425, 33426,<br>33427, 33400,<br>33401, 33403,<br>33864, 33460,<br>33464, 33474,<br>33417, 33468,<br>33496, 33600,<br>33602, 33418,<br>33419, 33361,<br>33362, 33363,<br>33364, 33365,<br>33366, 33367,<br>33368, 33369,<br>33420, 33470,<br>33471, 33477,<br>92987 | 02RJ0JZ,<br>02RG07Z,<br>02RG08Z,<br>02RG0KZ,<br>02RF07Z,<br>02RF08Z,<br>02RF0KZ,<br>02RH07Z,<br>02RH08Z,<br>02RH0KZ,<br>02RJ07Z,<br>02RJ08Z,<br>02RJ0KZ,<br>027G04Z,<br>027G0DZ,<br>027G0ZZ,<br>02NG0ZZ,<br>02QG0ZZ,<br>02CG0ZZ,<br>02UG0JZ,<br>027F0ZZ,<br>02NF0ZZ,<br>02QF0ZZ,<br>02UF0JZ,<br>027H0ZZ,<br>02NH0ZZ,<br>02QH0ZZ,<br>027J0ZZ,<br>02NJ0ZZ,<br>02QJ0ZZ,<br>02UH0JZ,<br>02UJ0JZ, |
|--|--|--|------------------------------------------------------------------------------------------------------------------------------------------------------------------------------------------------------------------------------------------------------------------------------------------------------------------------------------------------------------------------------------------------------------------------------------------------------------------------------------------------------------------------------|----------------------------------------------------------------------------------------------------------------------------------------------------------------------------------------------------------------------------------------------------------------------------------------------------------------------------------------------------------------------------------------------|

|  |  |  |                                                        |                                                                                                                                                                                                                                                                                                                                                                                              |
|--|--|--|--------------------------------------------------------|----------------------------------------------------------------------------------------------------------------------------------------------------------------------------------------------------------------------------------------------------------------------------------------------------------------------------------------------------------------------------------------------|
|  |  |  | HCPC codes:<br>0257T, 0258T,<br>0259T, 0262T,<br>0318T | 02RF37H,<br>02RF37Z,<br>02RF38H,<br>02RF38Z,<br>02RF3JH,<br>02RF3JZ,<br>02RF3KH,<br>02RF3KZ,<br>02RF47Z,<br>02RF48Z,<br>02RF4KZ,<br>02RG37H,<br>02RG37Z,<br>02RG38H,<br>02RG38Z,<br>02RG3JH,<br>02RG3KH,<br>02RG3KZ,<br>02RG47Z,<br>02RG48Z,<br>02RG4KZ,<br>02RH37H,<br>02RH37Z,<br>02RH38H,<br>02RH38Z,<br>02RH3JH,<br>02RH3JZ,<br>02RH3KH,<br>02RH3KZ,<br>02RH47Z,<br>02RH48Z,<br>02RH4KZ, |
|--|--|--|--------------------------------------------------------|----------------------------------------------------------------------------------------------------------------------------------------------------------------------------------------------------------------------------------------------------------------------------------------------------------------------------------------------------------------------------------------------|

|               |                                                      |                           |                                                                                                                     |                                                                                                                                                                                                                                                                                                         |
|---------------|------------------------------------------------------|---------------------------|---------------------------------------------------------------------------------------------------------------------|---------------------------------------------------------------------------------------------------------------------------------------------------------------------------------------------------------------------------------------------------------------------------------------------------------|
|               |                                                      |                           |                                                                                                                     | 02RJ47Z,<br>02RJ48Z,<br>02RJ4KZ,<br>X2RF332,<br>027F3ZZ,<br>027G3ZZ,<br>027H3ZZ,<br>027J3ZZ,<br>02CF3ZZ,<br>02CF4ZZ,<br>02CG3ZZ,<br>02CG4ZZ,<br>02CH3ZZ,<br>02CH4ZZ,<br>02CJ3ZZ,<br>02CJ4ZZ,<br>02NF3ZZ,<br>02NF4ZZ,<br>02NG3ZZ,<br>02NG4ZZ,<br>02NH3ZZ,<br>02NH4ZZ,<br>02NJ3ZZ,<br>02NJ4ZZ,<br>02UG3JZ |
| Prior ICD/PPM | V53.31, V45.00,<br>V45.01, 996.01,<br>996.61, V45.02 | Z95.0, Z45.0x,<br>Z95.810 | 37.71, 37.75,<br>37.76, 37.79,<br>37.80, 37.81,<br>37.82, 37.85,<br>37.86, 37.89,<br>39.64, 89.45,<br>89.46, 89.47, | 02HK0JZ,<br>02HK3JZ,<br>02HK4JZ,<br>02HK0MZ,<br>02HK3MZ,<br>02HK4MZ,<br>02HK0NZ,                                                                                                                                                                                                                        |

|  |  |                                                                                                                                                                                                                                                                                                                                                                                                                                                                                                                                                                                 |                                                                                                                                                                                                                                                                                                                                                                                                                                                 |
|--|--|---------------------------------------------------------------------------------------------------------------------------------------------------------------------------------------------------------------------------------------------------------------------------------------------------------------------------------------------------------------------------------------------------------------------------------------------------------------------------------------------------------------------------------------------------------------------------------|-------------------------------------------------------------------------------------------------------------------------------------------------------------------------------------------------------------------------------------------------------------------------------------------------------------------------------------------------------------------------------------------------------------------------------------------------|
|  |  | <p>89.48, 37.70,<br/>37.72, 37.73,<br/>37.83, 37.87,<br/>37.20, 37.94,<br/>37.95, 37.96,<br/>37.97, 37.98,<br/>89.49, 00.50,<br/>00.51, 00.52,<br/>00.53, 00.54</p> <p>CPT codes:<br/>33216, 33207,<br/>33212, 33218,<br/>33222, 33224,<br/>33225, 33227,<br/>33233, 93279,<br/>93286, 93288,<br/>93293, 93294,<br/>93296, 93724,<br/>33217, 33206,<br/>33208, 33213,<br/>33221, 93280,<br/>93281, 33228,<br/>33229, 33220,<br/>33214, 33215,<br/>33223, 33230,<br/>33231, 33240,<br/>33241, 33249,<br/>33262, 33263,<br/>33264, 93260,<br/>93261, 93282,<br/>93283, 93284,</p> | <p>02HK3NZ,<br/>02HK4NZ,<br/>0JH804Z,<br/>0JH834Z,<br/>0JH604Z,<br/>0JH634Z,<br/>0JH805Z,<br/>0JH835Z,<br/>0JH605Z,<br/>0JH635Z,<br/>4B02XSZ,<br/>02WA0NZ,<br/>02WA3NZ,<br/>02WA4NZ,<br/>02WA0MZ,<br/>02WA3MZ,<br/>02WA4MZ,<br/>02H60JZ,<br/>02H63JZ,<br/>02H64JZ,<br/>02H60MZ,<br/>02H63MZ,<br/>02H64MZ,<br/>02H60NZ,<br/>02H63NZ,<br/>02H64NZ,<br/>0JH806Z,<br/>0JH836Z,<br/>0JH606Z,<br/>0JH636Z,<br/>0JH808Z,<br/>0JH838Z,<br/>0JH608Z,</p> |
|--|--|---------------------------------------------------------------------------------------------------------------------------------------------------------------------------------------------------------------------------------------------------------------------------------------------------------------------------------------------------------------------------------------------------------------------------------------------------------------------------------------------------------------------------------------------------------------------------------|-------------------------------------------------------------------------------------------------------------------------------------------------------------------------------------------------------------------------------------------------------------------------------------------------------------------------------------------------------------------------------------------------------------------------------------------------|



|  |  |  |                                                                            |                                                                                                                                                                                                                                                                                                                                                                                                      |
|--|--|--|----------------------------------------------------------------------------|------------------------------------------------------------------------------------------------------------------------------------------------------------------------------------------------------------------------------------------------------------------------------------------------------------------------------------------------------------------------------------------------------|
|  |  |  | 93287, 93289,<br>93295, 33226<br><br>HCPC codes:<br>0389T, 0390T,<br>0391T | 0JH638Z,<br>02H40KZ,<br>02H43KZ,<br>02H44KZ,<br>02H70KZ,<br>02H73KZ,<br>02H74KZ,<br>02HL0K,<br>02HL3KZ,<br>02HL4KZ,<br>02HN0KZ,<br>02HN3KZ,<br>02HN4KZ,<br>02H60K,<br>02H63KZ,<br>02H64K,<br>02HK0KZ,<br>02HK3KZ,<br>02HK4KZ,<br>4B02XTZ,<br>0JH807Z,<br>0JH837Z,<br>0JH607Z,<br>0JH637Z,<br>02H40NZ,<br>02H43NZ,<br>02H44NZ,<br>02H40JZ,<br>02H43JZ,<br>02H44JZ,<br>02HN0JZ,<br>02HN3JZ,<br>02HN4JZ |
|--|--|--|----------------------------------------------------------------------------|------------------------------------------------------------------------------------------------------------------------------------------------------------------------------------------------------------------------------------------------------------------------------------------------------------------------------------------------------------------------------------------------------|

|                                                                                |                                  |                                                                  |                                                                                                                                                                              |                                                                                                                  |
|--------------------------------------------------------------------------------|----------------------------------|------------------------------------------------------------------|------------------------------------------------------------------------------------------------------------------------------------------------------------------------------|------------------------------------------------------------------------------------------------------------------|
|                                                                                |                                  |                                                                  |                                                                                                                                                                              |                                                                                                                  |
| Prior dialysis                                                                 | --                               | --                                                               | 39.95, 54.98<br><br>CPT codes:<br>90935, 90937,<br>90940, 90965,<br>90966, S9335,<br>99512, 90945,<br>90947, 90969,<br>90970, 90999,<br>G0257                                | 5A1D00Z,<br>5A1D60Z,<br>3E1M39Z<br><br>Revenue codes:<br>0820-0829, 0800,<br>0802-0809, 0830-<br>0859, 0880-0889 |
| History of smoking                                                             | V15.82, 649.0x,<br>305.1, 989.84 | F17.xxx,<br>O99.33x, T65.2x,<br>Z53.01, Z71.6,<br>Z72.0, Z87.891 | CPT codes:<br>1034F, 4000F,<br>4001F, 4004F,<br>99406, 99407,<br>C9801, C9802,<br>D1320, G0375,<br>G0376, G0436,<br>G0437, G8402,<br>G8453, G8455,<br>G9276, G9458,<br>G9792 | --                                                                                                               |
| Active smoking (i.e. documented within 30 days prior to index hospitalization) | 649.0x, 305.1,<br>989.84         | F17.xxx,<br>O99.33x, Z53.01,<br>Z72.0                            | --                                                                                                                                                                           | --                                                                                                               |

B. CVD during index hospitalization

| Diagnosis     | ICD-9 codes                              | ICD-10 codes                                   |
|---------------|------------------------------------------|------------------------------------------------|
| Heart failure | 428.x, 402.x1, 404.x1,<br>404.x3, 398.91 | I50.x, I97.13x, I11.0, I13.0,<br>I13.2, I09.81 |

|                                   |                                                                                                                                                                                 |                                                                                               |
|-----------------------------------|---------------------------------------------------------------------------------------------------------------------------------------------------------------------------------|-----------------------------------------------------------------------------------------------|
| Acute MI                          | 410.x1                                                                                                                                                                          | I21.x                                                                                         |
| Unstable angina                   | 411.1                                                                                                                                                                           | I20.0, I25.110, I25.700,<br>I25.710, I25.720, I25.730,<br>I25.750, I25.760, I25.790           |
| Atrial fibrillation or flutter    | 427.3x                                                                                                                                                                          | I48.x                                                                                         |
| Cardiac arrest / VF               | 427.4x, 427.5                                                                                                                                                                   | I46.x, I49.0x                                                                                 |
| Cardiogenic shock                 | 785.51                                                                                                                                                                          | R57.0                                                                                         |
| Coronary disease                  | 414.x (except 414.1x)                                                                                                                                                           | I25.1x, I25.7x, I25.8x,<br>I25.9                                                              |
| Valve disease of any type         | 424.0-3, 394.x, 396.x,<br>746.6                                                                                                                                                 | I05-I08.x, I34-I37.x,<br>Q23.3                                                                |
| Cardiomyopathy                    | 425.1x, 425.4, 425.5,<br>425.7, 425.8, 425.9,<br>674.5x                                                                                                                         | B33.24, E88.89, F10.988,<br>I25.5, I42.1, I42.2, I42.6,<br>I42.7, I42.8, I42.9, I43,<br>O90.3 |
| SVT other than AF                 | 427.0                                                                                                                                                                           | I47.1                                                                                         |
| VT other than VF                  | 427.1, 427.4x, 427.5                                                                                                                                                            | I46.2, I46.8, I46.9, I47.0,<br>I47.2, I49.0x                                                  |
| Ischemic Stroke/systemic embolism | 433.01, 433.11, 433.21,<br>433.31, 433.81, 433.91,<br>434.01, 434.11, 434.91,<br>436, 444                                                                                       | I63.x, I74.x                                                                                  |
| Intracranial hemorrhage           | 430, 431, 432.x,<br>852.x, 853.x, 800.2x,<br>800.3x, 800.7x, 800.8x,<br>801.2x, 801.3x, 801.7x,<br>801.8x, 803.2x, 803.3x,<br>803.7x, 803.8x, 804.2x,<br>804.3x, 804.7x, 804.8x | I60.x, I61.x, S06.34x,<br>S06.35x, S06.36x,<br>S06.37x, S06.38x, S06.4x,<br>S06.5x, S06.6x    |

**Table S2.** Cardiovascular Risk Factors based on hospital discharge International Classification of Disease 9<sup>th</sup> and 10<sup>th</sup> Revisions Clinical Modification (ICD-9/10) codes.

| <b>Risk Factor</b>     | <b>ICD-9 diagnosis codes</b>                                                                                              | <b>ICD-10 diagnosis codes</b>                                                                                                                                                                                          |
|------------------------|---------------------------------------------------------------------------------------------------------------------------|------------------------------------------------------------------------------------------------------------------------------------------------------------------------------------------------------------------------|
| Hypertension           | 401.xx-405.xx                                                                                                             | I10.xx-I15.xx                                                                                                                                                                                                          |
| Hyperlipidemia         | 272.0, 272.1, 272.2, 272.4                                                                                                | E78.0x, E78.1, E78.2, E78.4, E78.5                                                                                                                                                                                     |
| Diabetes mellitus      | 250.xx, 362.0x, 357.2, 366.41                                                                                             | E08.xx, E09.xx, E10.xx, E11.xx, E13.xx                                                                                                                                                                                 |
| Chronic kidney disease | 403.01, 403.11, 403.91, 404.02, 404.03, 404.12, 404.13, 404.92, 404.93, 585.3, 585.4, 585.5, 585.6, 792.5, 996.81, V56.xx | T81.502x, T81.512x, T81.522x, T81.532x, T81.592x, T85.611x, T85.621x, T85.631x, T85.691x, T85.71x, I12.0, I13.11, I13.2, I95.3, N18.3, N18.4, N18.5, N18.6, R88.0, T86.1x, Y84.1, Z48.22, Z49.xx, Z91.15, Z94.0, Z99.2 |
| Obesity                | 278.00, 278.01, 278.03, V85.3x, V85.4x                                                                                    | E66.1, E66.2, E66.8, E66.9, E66.0x, Z68.3x, Z68.4x                                                                                                                                                                     |
| Tobacco dependence     | 649.0x, 305.1, 989.84                                                                                                     | F17.xxx, O99.33x, Z53.01, Z72.0                                                                                                                                                                                        |

**Table S3.** Explicit Sepsis Definition based on hospital discharge International Classification of Disease 9<sup>th</sup> and 10<sup>th</sup> Revisions Clinical Modification (ICD-9/10) codes.

| <b>Diagnosis</b> | <b>ICD-9 diagnosis codes</b>                           | <b>ICD-10 diagnosis codes</b>                                                                  |
|------------------|--------------------------------------------------------|------------------------------------------------------------------------------------------------|
| Sepsis           | 995.9x, 038.x, 790.7,<br>020.0, 112.5, 112.81<br>117.9 | A40.x, A41.x, R65.1x,<br>R65.20, R78.81, A02.1,<br>A20.7, A22.7, A26.7, A32.7,<br>A42.7, B37.7 |
| Septic shock     | 785.52                                                 | R65.21                                                                                         |

**Table S4.** Implicit Sepsis Definition based on hospital discharge International Classification of Disease 9<sup>th</sup> and 10<sup>th</sup> Revisions Clinical Modification (ICD-9/10) codes. Implicit sepsis required at least one ICD-9/10 code for infection (A) and at least one ICD-9/10 code for organ dysfunction.

A. Infection

| <b>Diagnosis</b>            | <b>ICD-9 diagnosis codes</b>                                                | <b>ICD-10 diagnosis codes</b>                                                                              |
|-----------------------------|-----------------------------------------------------------------------------|------------------------------------------------------------------------------------------------------------|
| Bacterial/fungal infections | 001-005, 008-018, 020-027, 031-041, 090-098, 100-104, 110-112, 114-118      | A00-05, A09, A15, A17-19, A20-28, A30-32, A35-49, A50-54, A65-69, B35-49, B95-96                           |
| CNS                         | 320, 322, 324, 325                                                          | G00, G01, G06, G08                                                                                         |
| Cardiac/vascular            | 420, 421, 451                                                               | I30, I33, I80                                                                                              |
| ENT/URI                     | 461-465                                                                     | J01-04, J06                                                                                                |
| Pulmonary                   | 481, 482, 485, 586, 491.21, 494, 510, 513                                   | J13, J14, J15, J18, J95.81x, J69.0, J47, J44.0, J86, J85                                                   |
| GI                          | 540-542, 562.01/03, 562.11/13, 566, 567, 569.5, 569.83, 572.0, 572.1, 575.0 | K35-37, K57.0x, K57.2x, K57.4x, K57.8x, K57.92, K57.93, K61, K65, K63.1, K63.0, K75.0, K75.1, K81.0, K81.2 |
| GU                          | 590, 597, 599.0, 601, 614-616                                               | N10, N39.0, N34, N41, N70-73                                                                               |
| Skin/soft tissue/bone/joint | 681-683, 686, 711.0, 730, 785.4, 728.86                                     | I96, M72.6, L03-04, L08, M00, M86,                                                                         |
| Iatrogenic                  | 998.5, 999.3                                                                | T81.4x, T82.6x, T82.7x, T83.5x, T83.6x, T84.5x, T84.6x, T84.7x, T85.7x, T87.5x, T88.0x, T80.2x             |
| Sepsis/bacteremia           | 995.9x, 790.7, 785.52                                                       | R65.1x, R65.2x R78.81, T81.12x                                                                             |

B. Organ dysfunction

| <b>Diagnosis</b>    | <b>ICD-9 diagnosis codes</b>               | <b>ICD-10 diagnosis codes</b>                                              | <b>ICD-9 procedure codes</b> | <b>ICD-10 procedure codes</b>                                                                            |
|---------------------|--------------------------------------------|----------------------------------------------------------------------------|------------------------------|----------------------------------------------------------------------------------------------------------|
| Respiratory failure | 518.81, 518.82, 518.85, 786.09, 799.1      | J96.0x, J96.2x, J96.9x, R06.03, R09.2                                      | 96.7x                        | 5A1935Z<br>5A1945Z<br>5A1955Z                                                                            |
| Circulatory failure | 458.x, 785.5x, 796.3                       | R57.9, I95.x, R65.21                                                       | ---                          | ---                                                                                                      |
| Renal failure       | 584.x, 580.x                               | N00.x, N17.x                                                               | 39.95                        | 5A1D70Z<br>5A1D80Z<br>5A1D90Z                                                                            |
| Hepatic failure     | 570, 572.2, 573.3                          | K72.0x, K72.9x, K75.9                                                      | ---                          | ---                                                                                                      |
| Hematologic failure | 286.2, 286.6, 286.9, 287.3x, 287.4x, 287.5 | D65, D69.5x, D69.6, D68.9                                                  | ---                          | ---                                                                                                      |
| Metabolic failure   | 276.2                                      | E87.2                                                                      | ---                          | ---                                                                                                      |
| Neurologic failure  | 293.xx, 348.1, 348.3x, 780.01, 780.09      | G92, G93.4x, G93.1, F05, R41.0, F06.0, F06.2, R40.20, R40.4, R40.1, R41.82 | 89.14                        | 4A00x4Z where x=3,7,8,X<br>4A01x4Z where x=3,7,8,X<br>4A10x4Z where x=3,7,8,X<br>4A11x4Z where x=3,7,8,X |

**Table S5.** Index Hospitalization Characteristics based on hospital discharge International Classification of Disease 9<sup>th</sup> and 10<sup>th</sup> Revisions Clinical Modification (ICD-9/10) codes.

| <b>Characteristic</b> | <b>ICD-9 diagnosis codes</b> | <b>ICD-10 diagnosis codes</b> | <b>ICD-9 procedure codes</b> | <b>ICD-10 procedure codes</b>   |
|-----------------------|------------------------------|-------------------------------|------------------------------|---------------------------------|
| Infection             | See Supplementary Table 2A   |                               | --                           | --                              |
| Organ failure         | See Supplementary Table 2B   |                               | --                           | --                              |
| Intensive care unit   | Revenue codes: 020x, 021x    |                               | --                           | --                              |
| Invasive ventilation  | --                           | --                            | 96.70,<br>96.71,<br>96.72    | 5A1935Z,<br>5A1945Z,<br>5A1955Z |
| Hemodialysis          | --                           | --                            | 39.95                        | 5A1D70Z,<br>5A1D80Z,<br>5A1D90Z |
| CVD diagnosis         | See Supplementary Table 3B   |                               | --                           | --                              |



**Table S6:** Variables included in the propensity score for sepsis and standard mean differences between the sepsis and no sepsis groups before and after propensity score overlap weighting.

|                    | Before Propensity Score Weighting |                       |                            | After Propensity Score Weighting |                       |                            |
|--------------------|-----------------------------------|-----------------------|----------------------------|----------------------------------|-----------------------|----------------------------|
|                    | No sepsis<br>(N=1,449,821)        | Sepsis<br>(N=808,673) | Standardized<br>Difference | No sepsis<br>(N=1,449,821)       | Sepsis<br>(N=808,673) | Standardized<br>Difference |
| <b>Age group</b>   |                                   |                       |                            |                                  |                       |                            |
| 18-54 years        | 450919 (31.1%)                    | 124249 (15.4%)        | 0.379                      | 21.2%                            | 21.2%                 | 0.000                      |
| 55-64 years        | 347422 (24.0%)                    | 158929 (19.7%)        | 0.105                      | 22.1%                            | 22.1%                 | 0.000                      |
| 65-74 years        | 285200 (19.7%)                    | 194439 (24.0%)        | 0.106                      | 22.3%                            | 22.3%                 | 0.000                      |
| 75+ years          | 366280 (25.3%)                    | 331056 (40.9%)        | 0.338                      | 34.3%                            | 34.3%                 | 0.000                      |
| <b>Sex</b>         |                                   |                       |                            |                                  |                       |                            |
| Female             | 789512 (54.5%)                    | 438058 (54.2%)        | 0.006                      | 55.5%                            | 55.5%                 | 0.000                      |
| Male               | 660309 (45.5%)                    | 370615 (45.8%)        | 0.006                      | 44.5%                            | 44.5%                 | 0.000                      |
| <b>Race</b>        |                                   |                       |                            |                                  |                       |                            |
| Unknown            | 251601 (17.4%)                    | 103265 (12.8%)        | 0.128                      | 14.8%                            | 14.8%                 | 0.000                      |
| Asian              | 29042 (2.0%)                      | 15110 (1.9%)          | 0.010                      | 1.8%                             | 1.8%                  | 0.000                      |
| Black              | 175974 (12.1%)                    | 111714 (13.8%)        | 0.050                      | 13.0%                            | 13.0%                 | 0.000                      |
| Hispanic           | 104386 (7.2%)                     | 56237 (7.0%)          | 0.010                      | 7.3%                             | 7.3%                  | 0.000                      |
| White              | 888818 (61.3%)                    | 522347 (64.6%)        | 0.068                      | 63.1%                            | 63.1%                 | 0.000                      |
| <b>Region</b>      |                                   |                       |                            |                                  |                       |                            |
| Unknown            | 3055 (0.2%)                       | 1186 (0.1%)           | 0.015                      | 0.2%                             | 0.2%                  | 0.000                      |
| Midwest            | 404171 (27.9%)                    | 226434 (28.0%)        | 0.003                      | 27.5%                            | 27.5%                 | 0.000                      |
| Northeast          | 227047 (15.7%)                    | 132902 (16.4%)        | 0.021                      | 16.1%                            | 16.1%                 | 0.000                      |
| South              | 666092 (45.9%)                    | 368145 (45.5%)        | 0.008                      | 46.4%                            | 46.4%                 | 0.000                      |
| West               | 149456 (10.3%)                    | 80006 (9.9%)          | 0.014                      | 9.8%                             | 9.8%                  | 0.000                      |
| <b>Health plan</b> |                                   |                       |                            |                                  |                       |                            |

|                             |                |                |       |       |       |       |
|-----------------------------|----------------|----------------|-------|-------|-------|-------|
| Commercial                  | 789400 (54.4%) | 257979 (31.9%) | 0.467 | 41.4% | 41.4% | 0.000 |
| Medicare Advantage          | 660421 (45.6%) | 550694 (68.1%) | 0.467 | 58.6% | 58.6% | 0.000 |
| <b>Pharmacy coverage</b>    | 992543 (68.5%) | 604885 (74.8%) | 0.141 | 72.0% | 72.0% | 0.000 |
| <b>Infection type</b>       |                |                |       |       |       |       |
| Bacteria/fungal             | 83972 (5.8%)   | 381206 (47.1%) | 1.061 | 31.2% | 31.2% | 0.000 |
| CNS                         | 2621 (0.2%)    | 3769 (0.5%)    | 0.050 | 0.4%  | 0.4%  | 0.000 |
| Cardiovascular              | 9231 (0.6%)    | 11786 (1.5%)   | 0.081 | 1.6%  | 1.6%  | 0.000 |
| ENT/URI                     | 14039 (1.0%)   | 15748 (1.9%)   | 0.082 | 2.6%  | 2.6%  | 0.000 |
| Pulmonary                   | 68570 (4.7%)   | 277549 (34.3%) | 0.805 | 17.0% | 17.0% | 0.000 |
| GI                          | 52010 (3.6%)   | 31670 (3.9%)   | 0.017 | 5.9%  | 5.9%  | 0.000 |
| GU                          | 81736 (5.6%)   | 247626 (30.6%) | 0.686 | 23.2% | 23.2% | 0.000 |
| Skin/soft tissue/bone/joint | 73925 (5.1%)   | 82120 (10.2%)  | 0.191 | 14.3% | 14.3% | 0.000 |
| Iatrogenic                  | 14444 (1.0%)   | 21269 (2.6%)   | 0.123 | 3.2%  | 3.2%  | 0.000 |
| Sepsis/bacteremia           | 3242 (0.2%)    | 168363 (20.8%) | 0.713 | 2.3%  | 2.3%  | 0.000 |
| <b>Organ failure type</b>   |                |                |       |       |       |       |
| Respiratory                 | 85496 (5.9%)   | 258185 (31.9%) | 0.705 | 14.9% | 14.9% | 0.000 |
| Circulatory                 | 61094 (4.2%)   | 138130 (17.1%) | 0.427 | 9.9%  | 9.9%  | 0.000 |
| Renal                       | 136693 (9.4%)  | 338870 (41.9%) | 0.801 | 24.1% | 24.1% | 0.000 |
| Hepatic                     | 8512 (0.6%)    | 17715 (2.2%)   | 0.137 | 1.6%  | 1.6%  | 0.000 |
| Hematologic                 | 42621 (2.9%)   | 81473 (10.1%)  | 0.292 | 7.2%  | 7.2%  | 0.000 |
| Metabolic                   | 26155 (1.8%)   | 53766 (6.6%)   | 0.243 | 4.3%  | 4.3%  | 0.000 |
| Neurologic                  | 76993 (5.3%)   | 179734 (22.2%) | 0.506 | 12.7% | 12.7% | 0.000 |
| <b>Comorbidities</b>        |                |                |       |       |       |       |
| MI                          | 133617 (9.2%)  | 126051 (15.6%) | 0.194 | 11.9% | 11.9% | 0.000 |
| CAD                         | 446032 (30.8%) | 356481 (44.1%) | 0.278 | 37.1% | 37.1% | 0.000 |

|                                  |                 |                |       |       |       |       |
|----------------------------------|-----------------|----------------|-------|-------|-------|-------|
| Heart failure                    | 222407 (15.3%)  | 256655 (31.7%) | 0.394 | 23.0% | 23.0% | 0.000 |
| Cardiomyopathy                   | 100189 (6.9%)   | 96784 (12.0%)  | 0.174 | 9.0%  | 9.0%  | 0.000 |
| Hypertension                     | 1069012 (73.7%) | 691060 (85.5%) | 0.294 | 80.8% | 80.8% | 0.000 |
| Chronic kidney disease           | 121454 (8.4%)   | 162920 (20.1%) | 0.341 | 14.1% | 14.1% | 0.000 |
| SVT                              | 47782 (3.3%)    | 37337 (4.6%)   | 0.068 | 3.7%  | 3.7%  | 0.000 |
| Atrial fibrillation/flutter      | 203769 (14.1%)  | 189976 (23.5%) | 0.243 | 18.0% | 18.0% | 0.000 |
| VT                               | 48135 (3.3%)    | 47666 (5.9%)   | 0.123 | 4.3%  | 4.3%  | 0.000 |
| Hyperlipidemia                   | 1010638 (69.7%) | 621013 (76.8%) | 0.161 | 73.7% | 73.7% | 0.000 |
| Obesity                          | 394056 (27.2%)  | 248730 (30.8%) | 0.079 | 29.5% | 29.5% | 0.000 |
| Diabetes                         | 440949 (30.4%)  | 352441 (43.6%) | 0.275 | 38.1% | 38.1% | 0.000 |
| Stroke                           | 133088 (9.2%)   | 138394 (17.1%) | 0.236 | 12.6% | 12.6% | 0.000 |
| PCI                              | 103615 (7.1%)   | 80653 (10.0%)  | 0.101 | 8.1%  | 8.1%  | 0.000 |
| CABG                             | 85075 (5.9%)    | 73615 (9.1%)   | 0.123 | 7.3%  | 7.3%  | 0.000 |
| Valve procedure                  | 11597 (0.8%)    | 10459 (1.3%)   | 0.049 | 1.0%  | 1.0%  | 0.000 |
| ICD/PPM                          | 69439 (4.8%)    | 65183 (8.1%)   | 0.134 | 6.3%  | 6.3%  | 0.000 |
| Renal failure requiring dialysis | 17198 (1.2%)    | 26182 (3.2%)   | 0.140 | 2.1%  | 2.1%  | 0.000 |
| History of smoking               | 456169 (31.5%)  | 321588 (39.8%) | 0.174 | 35.0% | 35.0% | 0.000 |
| Active smoker                    | 296008 (20.4%)  | 189433 (23.4%) | 0.073 | 21.3% | 21.3% | 0.000 |
| <b>Index hospitalization</b>     |                 |                |       |       |       |       |
| ICU                              | 449257 (31.0%)  | 357378 (44.2%) | 0.275 | 32.9% | 32.9% | 0.000 |
| Invasive ventilation             | 11580 (0.8%)    | 41662 (5.2%)   | 0.258 | 2.2%  | 2.2%  | 0.000 |
| Hemodialysis                     | 4625 (0.3%)     | 17447 (2.2%)   | 0.167 | 1.0%  | 1.0%  | 0.000 |
| CV diagnosis                     |                 |                |       |       |       |       |
| Heart failure                    | 204613 (14.1%)  | 225294 (27.9%) | 0.342 | 19.7% | 19.7% | 0.000 |
| MI                               | 55056 (3.8%)    | 41637 (5.1%)   | 0.065 | 3.6%  | 3.6%  | 0.000 |
| Angina                           | 37072 (2.6%)    | 8435 (1.0%)    | 0.114 | 1.2%  | 1.2%  | 0.000 |
| Atrial fibrillation              | 207768 (14.3%)  | 168809 (20.9%) | 0.172 | 16.2% | 16.2% | 0.000 |
| Cardiac arrest                   | 5626 (0.4%)     | 6974 (0.9%)    | 0.060 | 0.5%  | 0.5%  | 0.000 |
| Cardiogenic shock                | 1732 (0.1%)     | 4615 (0.6%)    | 0.077 | 0.3%  | 0.3%  | 0.000 |

|                       |                |                |       |       |       |       |
|-----------------------|----------------|----------------|-------|-------|-------|-------|
| CAD                   | 267646 (18.5%) | 167828 (20.8%) | 0.058 | 19.0% | 19.0% | 0.000 |
| Valve disease         | 176252 (12.2%) | 124402 (15.4%) | 0.094 | 12.9% | 12.9% | 0.000 |
| Cardiomyopathy        | 76338 (5.3%)   | 54715 (6.8%)   | 0.063 | 5.5%  | 5.5%  | 0.000 |
| SVT                   | 19657 (1.4%)   | 15716 (1.9%)   | 0.046 | 1.5%  | 1.5%  | 0.000 |
| VT                    | 27752 (1.9%)   | 23518 (2.9%)   | 0.065 | 2.1%  | 2.1%  | 0.000 |
| Stroke                | 133127 (9.2%)  | 60554 (7.5%)   | 0.061 | 7.0%  | 7.0%  | 0.000 |
| Intracranial bleeding | 36876 (2.5%)   | 12669 (1.6%)   | 0.069 | 1.7%  | 1.7%  | 0.000 |

**Table S7:** 30-day event rates (per 100 patients) in patients with and without sepsis, as a function of sepsis group.

|                           | No Sepsis (ref)    |                  |                    | Sepsis               |                  |                    |
|---------------------------|--------------------|------------------|--------------------|----------------------|------------------|--------------------|
|                           | No. with Events    | No. of Enrollees | Event Rate per 100 | No. with Events      | No. of Enrollees | Event Rate per 100 |
| <b>Outcomes</b>           | <b>N=1,449,821</b> |                  |                    | <b>N=808,673</b>     |                  |                    |
| Mortality                 | 3,329              | 1,449,821        | 0.23               | 6,355                | 808,673          | 0.79               |
| All-cause hospitalization | 103,387            | 1,446,672        | 7.15               | 95,608               | 802,667          | 11.91              |
| CVD hospitalization       | 34,934             | 1,446,672        | 2.41               | 38,569               | 802,667          | 4.81               |
| Composite #1              | 106,382            | 1,446,672        | 7.35               | 101,565              | 802,667          | 12.65              |
| Composite #2              | 38,122             | 1,446,672        | 2.64               | 44,741               | 802,667          | 5.57               |
|                           | No Sepsis (ref)    |                  |                    | Implicit Sepsis Only |                  |                    |
|                           | No. with Events    | No. of Enrollees | Event Rate per 100 | No. with Events      | No. of Enrollees | Event Rate per 100 |
| <b>Outcomes</b>           | <b>N=1,449,821</b> |                  |                    | <b>N=448,644</b>     |                  |                    |
| Mortality                 | 3,329              | 1,449,821        | 0.23               | 2,750                | 448,644          | 0.61               |
| All-cause hospitalization | 103,387            | 1,446,672        | 7.15               | 56,465               | 446,062          | 12.66              |
| CVD hospitalization       | 34,934             | 1,446,672        | 2.41               | 24,813               | 446,062          | 5.56               |
| Composite #1              | 106,382            | 1,446,672        | 7.35               | 58,973               | 446,062          | 13.22              |
| Composite #2              | 38,122             | 1,446,672        | 2.64               | 27,446               | 446,062          | 6.15               |
|                           | No Sepsis (ref)    |                  |                    | Explicit Sepsis Only |                  |                    |
|                           | No. with Events    | No. of Enrollees | Event Rate per 100 | No. with Events      | No. of Enrollees | Event Rate per 100 |
| <b>Outcomes</b>           | <b>N=1,449,821</b> |                  |                    | <b>N=124,841</b>     |                  |                    |
| Mortality                 | 3,329              | 1,449,821        | 0.23               | 247                  | 124,841          | 0.20               |
| All-cause hospitalization | 103,387            | 1,446,672        | 7.15               | 12,399               | 124,612          | 9.95               |
| CVD hospitalization       | 34,934             | 1,446,672        | 2.41               | 3,393                | 124,612          | 2.72               |
| Composite #1              | 106,382            | 1,446,672        | 7.35               | 12,599               | 124,612          | 10.11              |
| Composite #2              | 38,122             | 1,446,672        | 2.64               | 3,625                | 124,612          | 2.91               |

|                           | No Sepsis (ref) |                    |                    | Both Sepsis Types |                  |                    |
|---------------------------|-----------------|--------------------|--------------------|-------------------|------------------|--------------------|
|                           | No. with Events | No. of Enrollees   | Event Rate per 100 | No. with Events   | No. of Enrollees | Event Rate per 100 |
| <b>Outcomes</b>           |                 | <b>N=1,449,821</b> |                    |                   | <b>N=235,188</b> |                    |
| Mortality                 | 3,329           | 1,449,821          | 0.23               | 3,358             | 235,188          | 1.43               |
| All-cause hospitalization | 103,387         | 1,446,672          | 7.15               | 26,744            | 231,993          | 11.53              |
| CVD hospitalization       | 34,934          | 1,446,672          | 2.41               | 10,363            | 231,993          | 4.47               |
| Composite #1              | 106,382         | 1,446,672          | 7.35               | 29,993            | 231,993          | 12.93              |
| Composite #2              | 38,122          | 1,446,672          | 2.64               | 13,670            | 231,993          | 5.89               |

**Table S8:** 90-day event rates (per 100 patients) in patients with and without sepsis, as a function of sepsis group.

|                           | No Sepsis (ref)    |                  |                    | Sepsis               |                  |                    |
|---------------------------|--------------------|------------------|--------------------|----------------------|------------------|--------------------|
|                           | No. with Events    | No. of Enrollees | Event Rate per 100 | No. with Events      | No. of Enrollees | Event Rate per 100 |
| <b>Outcomes</b>           | <b>N=1,449,821</b> |                  |                    | <b>N=808,673</b>     |                  |                    |
| Mortality                 | 38,419             | 1,449,821        | 2.65               | 54,776               | 808,673          | 6.77               |
| All-cause hospitalization | 211,510            | 1,341,267        | 15.77              | 212,135              | 718,898          | 29.51              |
| CVD hospitalization       | 74,867             | 1,341,267        | 5.58               | 92,702               | 718,898          | 12.90              |
| Composite #1              | 235,200            | 1,341,267        | 17.54              | 242,744              | 718,898          | 33.77              |
| Composite #2              | 106,018            | 1,341,267        | 7.90               | 134,079              | 718,898          | 18.65              |
|                           | No Sepsis (ref)    |                  |                    | Implicit Sepsis Only |                  |                    |
|                           | No. with Events    | No. of Enrollees | Event Rate per 100 | No. with Events      | No. of Enrollees | Event Rate per 100 |
| <b>Outcomes</b>           | <b>N=1,449,821</b> |                  |                    | <b>N=448,644</b>     |                  |                    |
| Mortality                 | 38,419             | 1,449,821        | 2.65               | 31,314               | 448,644          | 6.98               |
| All-cause hospitalization | 211,510            | 1,341,267        | 15.77              | 124,503              | 397,909          | 31.29              |
| CVD hospitalization       | 74,867             | 1,341,267        | 5.58               | 58,801               | 397,909          | 14.78              |
| Composite #1              | 235,200            | 1,341,267        | 17.54              | 140,995              | 397,909          | 35.43              |
| Composite #2              | 106,018            | 1,341,267        | 7.90               | 81,522               | 397,909          | 20.49              |
|                           | No Sepsis (ref)    |                  |                    | Explicit Sepsis Only |                  |                    |
|                           | No. with Events    | No. of Enrollees | Event Rate per 100 | No. with Events      | No. of Enrollees | Event Rate per 100 |
| <b>Outcomes</b>           | <b>N=1,449,821</b> |                  |                    | <b>N=124,841</b>     |                  |                    |
| Mortality                 | 38,419             | 1,449,821        | 2.65               | 4,067                | 124,841          | 3.26               |
| All-cause hospitalization | 211,510            | 1,341,267        | 15.77              | 26,588               | 115,517          | 23.02              |
| CVD hospitalization       | 74,867             | 1,341,267        | 5.58               | 8,115                | 115,517          | 7.02               |
| Composite #1              | 235,200            | 1,341,267        | 17.54              | 28,583               | 115,517          | 24.74              |
| Composite #2              | 106,018            | 1,341,267        | 7.90               | 11,270               | 115,517          | 9.76               |
|                           | No Sepsis (ref)    |                  |                    | Both Sepsis Types    |                  |                    |

|                           | <b>No. with<br/>Events</b> | <b>No. of<br/>Enrollees</b> | <b>Event Rate<br/>per 100</b> | <b>No. with<br/>Events</b> | <b>No. of<br/>Enrollees</b> | <b>Event Rate<br/>per 100</b> |
|---------------------------|----------------------------|-----------------------------|-------------------------------|----------------------------|-----------------------------|-------------------------------|
| <b>Outcomes</b>           |                            | <b>N=1,449,821</b>          |                               |                            | <b>N=235,188</b>            |                               |
| Mortality                 | 38,419                     | 1,449,821                   | 2.65                          | 19,395                     | 235,188                     | 8.25                          |
| All-cause hospitalization | 211,510                    | 1,341,267                   | 15.77                         | 61,044                     | 205,472                     | 29.71                         |
| CVD hospitalization       | 74,867                     | 1,341,267                   | 5.58                          | 25,786                     | 205,472                     | 12.55                         |
| Composite #1              | 235,200                    | 1,341,267                   | 17.54                         | 73,166                     | 205,472                     | 35.61                         |
| Composite #2              | 106,018                    | 1,341,267                   | 7.90                          | 41,287                     | 205,472                     | 20.09                         |



**Table S9:** One-year event rates (per 100 patients) in patients with and without sepsis, as a function of sepsis group.

|                           | No Sepsis (ref) |                    |                    | Sepsis               |                  |                    |
|---------------------------|-----------------|--------------------|--------------------|----------------------|------------------|--------------------|
|                           | No. with Events | No. of Enrollees   | Event Rate per 100 | No. with Events      | No. of Enrollees | Event Rate per 100 |
| <b>Outcomes</b>           |                 | <b>N=1,449,821</b> |                    |                      | <b>N=808,673</b> |                    |
| Mortality                 | 98,865          | 1,449,821          | 6.82               | 133,624              | 808,673          | 16.52              |
| All-cause hospitalization | 395,079         | 1,027,742          | 38.44              | 367,434              | 524,886          | 70.00              |
| CVD hospitalization       | 151,195         | 1,027,742          | 14.71              | 178,674              | 524,886          | 34.04              |
| Composite #1              | 440,830         | 1,027,742          | 42.89              | 416,748              | 524,886          | 79.40              |
| Composite #2              | 221,919         | 1,027,742          | 21.59              | 261,390              | 524,886          | 49.80              |
|                           | No Sepsis (ref) |                    |                    | Implicit Sepsis Only |                  |                    |
|                           | No. with Events | No. of Enrollees   | Event Rate per 100 | No. with Events      | No. of Enrollees | Event Rate per 100 |
| <b>Outcomes</b>           |                 | <b>N=1,449,821</b> |                    |                      | <b>N=448,644</b> |                    |
| Mortality                 | 98,865          | 1,449,821          | 6.82               | 79,888               | 448,644          | 17.81              |
| All-cause hospitalization | 395,079         | 1,027,742          | 38.44              | 216,632              | 286,201          | 75.69              |
| CVD hospitalization       | 151,195         | 1,027,742          | 14.71              | 112,965              | 286,201          | 39.47              |
| Composite #1              | 440,830         | 1,027,742          | 42.89              | 244,546              | 286,201          | 85.45              |
| Composite #2              | 221,919         | 1,027,742          | 21.59              | 160,111              | 286,201          | 55.94              |
|                           | No Sepsis (ref) |                    |                    | Explicit Sepsis Only |                  |                    |
|                           | No. with Events | No. of Enrollees   | Event Rate per 100 | No. with Events      | No. of Enrollees | Event Rate per 100 |
| <b>Outcomes</b>           |                 | <b>N=1,449,821</b> |                    |                      | <b>N=124,841</b> |                    |
| Mortality                 | 98,865          | 1,449,821          | 6.82               | 11,621               | 124,841          | 9.31               |
| All-cause hospitalization | 395,079         | 1,027,742          | 38.44              | 47,176               | 88,898           | 53.07              |
| CVD hospitalization       | 151,195         | 1,027,742          | 14.71              | 17,100               | 88,898           | 19.24              |
| Composite #1              | 440,830         | 1,027,742          | 42.89              | 50,940               | 88,898           | 57.30              |
| Composite #2              | 221,919         | 1,027,742          | 21.59              | 24,836               | 88,898           | 27.94              |
|                           | No Sepsis (ref) |                    |                    | Both Sepsis Types    |                  |                    |

|                           | <b>No. with<br/>Events</b> | <b>No. of<br/>Enrollees</b> | <b>Event Rate<br/>per 100</b> | <b>No. with<br/>Events</b> | <b>No. of<br/>Enrollees</b> | <b>Event Rate<br/>per 100</b> |
|---------------------------|----------------------------|-----------------------------|-------------------------------|----------------------------|-----------------------------|-------------------------------|
| <b>Outcomes</b>           |                            | <b>N=1,449,821</b>          |                               |                            | <b>N=235,188</b>            |                               |
| Mortality                 | 98,865                     | 1,449,821                   | 6.82                          | 42,115                     | 235,188                     | 17.91                         |
| All-cause hospitalization | 395,079                    | 1,027,742                   | 38.44                         | 103,626                    | 149,787                     | 69.18                         |
| CVD hospitalization       | 151,195                    | 1,027,742                   | 14.71                         | 48,599                     | 149,787                     | 32.45                         |
| Composite #1              | 440,830                    | 1,027,742                   | 42.89                         | 121,262                    | 149,787                     | 80.96                         |
| Composite #2              | 221,919                    | 1,027,742                   | 21.59                         | 76,443                     | 149,787                     | 51.03                         |

**Table S10:** Risk of all-cause post-discharge mortality associated with sepsis (all definitions) across subgroups. P values for interaction are unadjusted.

|                                         | No Sepsis (ref)    |                 |                          | Sepsis             |                 |                          | Hazard Ratio<br>(95% CI) | P<br>Value | P Value for<br>interaction |
|-----------------------------------------|--------------------|-----------------|--------------------------|--------------------|-----------------|--------------------------|--------------------------|------------|----------------------------|
|                                         | No. with<br>Events | Person<br>Years | Event<br>Rate per<br>100 | No. with<br>Events | Person<br>Years | Event<br>Rate<br>per 100 |                          |            |                            |
| <b>Age group</b>                        |                    |                 |                          |                    |                 |                          |                          |            | <0.0001                    |
| All <65 years                           | 25,610             | 2,127,816       | 1.20                     | 31,370             | 646,525         | 4.85                     | 1.83 (1.77, 1.90)        | <0.0001    |                            |
| 65+ years                               | 141,883            | 1,573,707       | 9.02                     | 189,058            | 1,048,002       | 18.04                    | 1.22 (1.20, 1.23)        | <0.0001    |                            |
| 50-64 years                             | 21,442             | 1,306,173       | 1.64                     | 26,855             | 471,293         | 5.70                     | 1.87 (1.80, 1.94)        | <0.0001    |                            |
| <50 years                               | 4,168              | 821,643         | 0.51                     | 4,515              | 175,232         | 2.58                     | 2.04 (1.86, 2.23)        | <0.0001    |                            |
| <b>Sex</b>                              |                    |                 |                          |                    |                 |                          |                          |            | 0.0001                     |
| Male                                    | 81,297             | 1,641,434       | 4.95                     | 104,053            | 755,290         | 13.78                    | 1.28 (1.25, 1.30)        | <0.0001    |                            |
| Female                                  | 86,196             | 2,060,089       | 4.18                     | 116,375            | 939,237         | 12.39                    | 1.26 (1.24, 1.28)        | <0.0001    |                            |
| <b>Race/Ethnicity</b>                   |                    |                 |                          |                    |                 |                          |                          |            | <0.0001                    |
| Asian                                   | 2,910              | 76,916          | 3.78                     | 3,910              | 32,400          | 12.07                    | 1.28 (1.16, 1.42)        | <0.0001    |                            |
| Black                                   | 21,512             | 426,475         | 5.04                     | 32,457             | 225,903         | 14.37                    | 1.31 (1.26, 1.36)        | <0.0001    |                            |
| Hispanic                                | 8,382              | 261,598         | 3.20                     | 12,216             | 115,521         | 10.57                    | 1.32 (1.25, 1.40)        | <0.0001    |                            |
| White                                   | 120,942            | 2,287,774       | 5.29                     | 155,325            | 1,113,655       | 13.95                    | 1.23 (1.21, 1.25)        | <0.0001    |                            |
| All non-White                           | 46,551             | 1,413,750       | 3.29                     | 65,103             | 580,872         | 11.21                    | 1.37 (1.34, 1.41)        | <0.0001    |                            |
| <b>Health plan</b>                      |                    |                 |                          |                    |                 |                          |                          |            | <0.0001                    |
| Commercial                              | 23,033             | 2,055,952       | 1.12                     | 22,546             | 564,867         | 3.99                     | 1.82 (1.75, 1.89)        | <0.0001    |                            |
| Medicare Advantage                      | 144,460            | 1,645,572       | 8.78                     | 197,882            | 1,129,660       | 17.52                    | 1.21 (1.19, 1.22)        | <0.0001    |                            |
| <b>Pharmacy coverage</b>                |                    |                 |                          |                    |                 |                          |                          |            | <0.0001                    |
| No                                      | 43,648             | 1,271,498       | 3.43                     | 47,650             | 457,007         | 10.43                    | 1.26 (1.22, 1.29)        | <0.0001    |                            |
| Yes                                     | 123,845            | 2,430,026       | 5.10                     | 172,868            | 1,237,520       | 13.97                    | 1.27 (1.25, 1.29)        | <0.0001    |                            |
| <b>Prior CVD</b>                        |                    |                 |                          |                    |                 |                          |                          |            | <0.0001                    |
| No                                      | 56,704             | 2,153,457       | 2.63                     | 53,264             | 724,153         | 7.36                     | 1.35 (1.32, 1.38)        | <0.0001    |                            |
| Yes                                     | 110,789            | 1,548,067       | 7.16                     | 167,164            | 970,374         | 17.23                    | 1.21 (1.19, 1.23)        | <0.0001    |                            |
| <b># of CVD risk factors</b>            |                    |                 |                          |                    |                 |                          |                          |            | <0.0001                    |
| <3                                      | 74,282             | 2,066,007       | 3.60                     | 69,862             | 653,848         | 10.68                    | 1.25 (1.22, 1.27)        | <0.0001    |                            |
| 3+                                      | 93,211             | 1,635,516       | 5.70                     | 150,566            | 1,040,680       | 14.47                    | 1.28 (1.26, 1.30)        | <0.0001    |                            |
| <b>ICU during index hospitalization</b> |                    |                 |                          |                    |                 |                          |                          |            | <0.0001                    |
| No                                      | 112,668            | 2,589,391       | 4.35                     | 118,549            | 976,556         | 12.14                    | 1.26 (1.24, 1.28)        | <0.0001    |                            |
| Yes                                     | 54,825             | 1,112,133       | 4.93                     | 101,879            | 717,971         | 14.19                    | 1.19 (1.16, 1.22)        | <0.0001    |                            |

|                                                       |         |           |      |         |           |       |                   |         |  |         |
|-------------------------------------------------------|---------|-----------|------|---------|-----------|-------|-------------------|---------|--|---------|
| <b>CVD diagnosis during index hospitalization</b>     |         |           |      |         |           |       |                   |         |  | 0.0183  |
| No                                                    | 62,629  | 2,123,764 | 2.95 | 68,723  | 808,795   | 8.50  | 1.42 (1.39, 1.45) | <0.0001 |  |         |
| Yes                                                   | 104,864 | 1,577,759 | 6.65 | 151,705 | 885,732   | 17.13 | 1.14 (1.12, 1.16) | <0.0001 |  |         |
| <b>Any organ failure during index hospitalization</b> |         |           |      |         |           |       |                   |         |  | <0.0001 |
| No                                                    | 108,553 | 2,950,183 | 3.68 | 19,810  | 287,247   | 6.90  | 1.32 (1.29, 1.34) | <0.0001 |  |         |
| Yes                                                   | 58,940  | 751,841   | 7.84 | 200,618 | 1,407,280 | 14.26 | 1.07 (0.99, 1.16) | 0.0810  |  |         |
| <b>AKI during index hospitalization</b>               |         |           |      |         |           |       |                   |         |  | <0.0001 |
| No                                                    | 141,152 | 3,417,975 | 4.13 | 118,658 | 1,012,190 | 11.72 | 1.73 (1.71, 1.75) | <0.0001 |  |         |
| Yes                                                   | 26,341  | 283,549   | 9.29 | 101,770 | 682,337   | 14.91 | 1.17 (1.04, 1.32) | 0.0107  |  |         |
| <b>Shock during index hospitalization</b>             |         |           |      |         |           |       |                   |         |  | <0.0001 |
| No                                                    | 166,144 | 3,686,045 | 4.51 | 203,020 | 1,588,099 | 12.78 | 1.75 (1.74, 1.77) | <0.0001 |  |         |
| Yes                                                   | 1,349   | 15,478    | 8.72 | 17,408  | 106,428   | 16.36 | 1.25 (0.96, 1.62) | 0.0951  |  |         |
| <b>Prior hospitalization within 6 months</b>          |         |           |      |         |           |       |                   |         |  | <0.0001 |
| No                                                    | 141,241 | 3,327,474 | 4.24 | 142,197 | 1,292,286 | 11.00 | 1.71 (1.69, 1.73) | <0.0001 |  |         |
| Yes                                                   | 26,252  | 374,049   | 7.02 | 78,231  | 402,241   | 19.45 | 1.96 (1.91, 2.01) | <0.0001 |  |         |

**Table S11:** Risk of all-cause hospitalization associated with sepsis (all definitions) across subgroups, using death as a competing risk. P values for interaction are unadjusted.

|                                         | No Sepsis (ref)    |                 |                          | Sepsis             |                 |                          | Hazard Ratio<br>(95% CI) | P<br>Value | P Value for<br>interaction |
|-----------------------------------------|--------------------|-----------------|--------------------------|--------------------|-----------------|--------------------------|--------------------------|------------|----------------------------|
|                                         | No. with<br>Events | Person<br>Years | Event<br>Rate per<br>100 | No. with<br>Events | Person<br>Years | Event<br>Rate per<br>100 |                          |            |                            |
| <b>Age group</b>                        |                    |                 |                          |                    |                 |                          |                          |            | <0.0001                    |
| All <65 years                           | 283,275            | 1,498,742       | 18.90                    | 149,842            | 366,018         | 40.94                    | 1.41 (1.39, 1.42)        | <0.0001    |                            |
| 65+ years                               | 321,576            | 990,179         | 32.48                    | 331,421            | 535,967         | 61.84                    | 1.38 (1.37, 1.40)        | <0.0001    |                            |
| 50-64 years                             | 186,450            | 910,128         | 20.49                    | 114,415            | 263,050         | 43.50                    | 1.40 (1.38, 1.42)        | <0.0001    |                            |
| <50 years                               | 96,825             | 588,614         | 16.45                    | 35,427             | 102,968         | 34.41                    | 1.43 (1.40, 1.46)        | <0.0001    |                            |
| <b>Sex</b>                              |                    |                 |                          |                    |                 |                          |                          |            | 0.0633                     |
| Male                                    | 275,890            | 1,110,995       | 24.83                    | 220,045            | 408,805         | 53.83                    | 1.40 (1.38, 1.41)        | <0.0001    |                            |
| Female                                  | 328,961            | 1,377,925       | 23.87                    | 261,218            | 493,180         | 52.97                    | 1.36 (1.35, 1.37)        | <0.0001    |                            |
| <b>Race/Ethnicity</b>                   |                    |                 |                          |                    |                 |                          |                          |            | <0.0001                    |
| Asian                                   | 10,714             | 55,156          | 19.42                    | 8,425              | 18,533          | 45.46                    | 1.39 (1.32, 1.47)        | <0.0001    |                            |
| Black                                   | 77,968             | 279,093         | 27.94                    | 70,695             | 112,682         | 62.74                    | 1.39 (1.36, 1.42)        | <0.0001    |                            |
| Hispanic                                | 40,992             | 180,242         | 22.74                    | 32,394             | 63,544          | 50.98                    | 1.36 (1.32, 1.39)        | <0.0001    |                            |
| White                                   | 383,756            | 1,512,054       | 25.38                    | 315,346            | 584,355         | 53.96                    | 1.37 (1.36, 1.38)        | <0.0001    |                            |
| All non-white                           | 221,095            | 976,867         | 22.63                    | 165,917            | 317,631         | 52.24                    | 1.39 (1.37, 1.41)        | <0.0001    |                            |
| <b>Health plan</b>                      |                    |                 |                          |                    |                 |                          |                          |            | <0.0001                    |
| Commercial                              | 266,937            | 1,476,499       | 18.08                    | 125,152            | 343,381         | 36.45                    | 1.40 (1.38, 1.41)        | <0.0001    |                            |
| Medicare Advantage                      | 337,914            | 1,012,422       | 33.38                    | 356,111            | 558,604         | 63.75                    | 1.37 (1.36, 1.38)        | <0.0001    |                            |
| <b>Pharmacy coverage</b>                |                    |                 |                          |                    |                 |                          |                          |            | <0.0001                    |
| No                                      | 181,967            | 872,619         | 20.85                    | 115,058            | 256,588         | 44.84                    | 1.39 (1.37, 1.41)        | <0.0001    |                            |
| Yes                                     | 422,884            | 1,616,302       | 26.16                    | 366,205            | 645,397         | 56.74                    | 1.37 (1.36, 1.38)        | <0.0001    |                            |
| <b>Prior CVD</b>                        |                    |                 |                          |                    |                 |                          |                          |            | 0.9397                     |
| No                                      | 290,899            | 1,529,893       | 19.01                    | 157,655            | 436,839         | 36.09                    | 1.36 (1.35, 1.37)        | <0.0001    |                            |
| Yes                                     | 313,952            | 959,028         | 32.74                    | 323,608            | 465,147         | 69.57                    | 1.39 (1.37, 1.40)        | <0.0001    |                            |
| <b># of CVD risk factors</b>            |                    |                 |                          |                    |                 |                          |                          |            | <0.0001                    |
| <3                                      | 285,977            | 1,448,908       | 19.74                    | 152,889            | 384,889         | 39.72                    | 1.34 (1.33, 1.36)        | <0.0001    |                            |
| 3+                                      | 318,874            | 1,040,012       | 30.66                    | 328,374            | 517,096         | 63.50                    | 1.41 (1.39, 1.42)        | <0.0001    |                            |
| <b>ICU during index hospitalization</b> |                    |                 |                          |                    |                 |                          |                          |            | <0.0001                    |
| No                                      | 415,107            | 1,740,894       | 23.84                    | 265,585            | 529,558         | 50.15                    | 1.36 (1.35, 1.37)        | <0.0001    |                            |
| Yes                                     | 189,744            | 748,027         | 25.37                    | 215,678            | 372,427         | 57.91                    | 1.36 (1.35, 1.38)        | <0.0001    |                            |

|                                                       |         |           |       |         |         |       |                   |         |  |
|-------------------------------------------------------|---------|-----------|-------|---------|---------|-------|-------------------|---------|--|
| <b>CVD diagnosis during index hospitalization</b>     |         |           |       |         |         |       |                   | <0.0001 |  |
| No                                                    | 304,717 | 1,471,436 | 20.71 | 191,886 | 463,331 | 41.41 | 1.38 (1.36, 1.39) | <0.0001 |  |
| Yes                                                   | 300,134 | 1,017,485 | 29.50 | 289,377 | 438,654 | 65.97 | 1.35 (1.34, 1.37) | <0.0001 |  |
| <b>Any organ failure during index hospitalization</b> |         |           |       |         |         |       |                   | <0.0001 |  |
| No                                                    | 453,049 | 1,993,195 | 22.73 | 63,461  | 170,660 | 37.19 | 1.32 (1.31, 1.33) | <0.0001 |  |
| Yes                                                   | 151,802 | 495,726   | 30.62 | 417,802 | 731,326 | 57.13 | 1.41 (1.35, 1.48) | <0.0001 |  |
| <b>AKI during index hospitalization</b>               |         |           |       |         |         |       |                   | <0.0001 |  |
| No                                                    | 540,494 | 2,304,326 | 23.46 | 271,301 | 554,121 | 48.96 | 1.44 (1.43, 1.45) | <0.0001 |  |
| Yes                                                   | 64,357  | 184,595   | 34.86 | 209,962 | 347,864 | 60.36 | 1.43 (1.32, 1.54) | <0.0001 |  |
| <b>Shock during index hospitalization</b>             |         |           |       |         |         |       |                   | 0.2293  |  |
| No                                                    | 601,916 | 2,478,483 | 24.29 | 449,627 | 845,574 | 53.17 | 1.48 (1.47, 1.49) | <0.0001 |  |
| Yes                                                   | 2,935   | 10,437    | 28.12 | 31,636  | 56,411  | 56.08 | 1.46 (1.21, 1.75) | <0.0001 |  |
| <b>Prior hospitalization within 6 months</b>          |         |           |       |         |         |       |                   | <0.0001 |  |
| No                                                    | 519,636 | 2,276,338 | 22.83 | 323,812 | 738,119 | 43.87 | 1.44 (1.43, 1.45) | <0.0001 |  |
| Yes                                                   | 85,215  | 212,583   | 40.09 | 157,451 | 163,867 | 96.08 | 1.61 (1.59, 1.63) | <0.0001 |  |

**Table S12:** Risk of cardiovascular hospitalization associated with sepsis (all definitions) across subgroups, using death as a competing risk. P values for interaction are unadjusted.

|                                         | No Sepsis (ref)    |                 |                          | Sepsis             |                 |                          | Hazard Ratio<br>(95% CI) | P<br>Value | P Value for<br>interaction |
|-----------------------------------------|--------------------|-----------------|--------------------------|--------------------|-----------------|--------------------------|--------------------------|------------|----------------------------|
|                                         | No. with<br>Events | Person<br>Years | Event<br>Rate per<br>100 | No. with<br>Events | Person<br>Years | Event<br>Rate per<br>100 |                          |            |                            |
| <b>Age group</b>                        |                    |                 |                          |                    |                 |                          |                          |            | <0.0001                    |
| All <65 years                           | 81,181             | 1,968,649       | 4.12                     | 61,582             | 547,440         | 11.25                    | 1.57 (1.54, 1.61)        | <0.0001    |                            |
| 65+ years                               | 180,064            | 1,281,510       | 14.05                    | 206,247            | 767,302         | 26.88                    | 1.42 (1.40, 1.44)        | <0.0001    |                            |
| 50-64 years                             | 63,060             | 1,186,143       | 5.32                     | 50,842             | 391,200         | 13.00                    | 1.60 (1.56, 1.64)        | <0.0001    |                            |
| <50 years                               | 18,121             | 782,506         | 2.32                     | 10,740             | 156,240         | 6.87                     | 1.61 (1.53, 1.68)        | <0.0001    |                            |
| <b>Sex</b>                              |                    |                 |                          |                    |                 |                          |                          |            | <0.0001                    |
| Male                                    | 133,482            | 1,411,355       | 9.46                     | 126,422            | 581,976         | 21.72                    | 1.42 (1.40, 1.44)        | <0.0001    |                            |
| Female                                  | 127,763            | 1,838,805       | 6.95                     | 141,407            | 732,766         | 19.30                    | 1.43 (1.41, 1.46)        | <0.0001    |                            |
| <b>Race/Ethnicity</b>                   |                    |                 |                          |                    |                 |                          |                          |            | 0.0006                     |
| Asian                                   | 4,567              | 68,998          | 6.62                     | 4,618              | 25,830          | 17.88                    | 1.34 (1.23, 1.47)        | <0.0001    |                            |
| Black                                   | 37,084             | 365,637         | 10.14                    | 42,385             | 166,599         | 25.44                    | 1.42 (1.38, 1.46)        | <0.0001    |                            |
| Hispanic                                | 16,939             | 232,796         | 7.28                     | 17,799             | 90,771          | 19.61                    | 1.33 (1.28, 1.39)        | <0.0001    |                            |
| White                                   | 171,886            | 1,986,376       | 8.65                     | 177,931            | 856,362         | 20.78                    | 1.43 (1.41, 1.45)        | <0.0001    |                            |
| All non-white                           | 89,359             | 1,263,784       | 7.07                     | 89,898             | 458,381         | 19.61                    | 1.43 (1.40, 1.45)        | <0.0001    |                            |
| <b>Health plan</b>                      |                    |                 |                          |                    |                 |                          |                          |            | <0.0001                    |
| Commercial                              | 76,461             | 1,908,542       | 4.01                     | 48,447             | 492,057         | 9.85                     | 1.55 (1.52, 1.59)        | <0.0001    |                            |
| Medicare Advantage                      | 184,784            | 1,341,618       | 13.77                    | 219,382            | 822,685         | 26.67                    | 1.39 (1.37, 1.41)        | <0.0001    |                            |
| <b>Pharmacy coverage</b>                |                    |                 |                          |                    |                 |                          |                          |            | <0.0001                    |
| No                                      | 70,172             | 1,139,965       | 6.16                     | 58,798             | 370,641         | 15.86                    | 1.44 (1.41, 1.48)        | <0.0001    |                            |
| Yes                                     | 191,073            | 2,110,194       | 9.05                     | 209,031            | 944,101         | 22.14                    | 1.42 (1.40, 1.44)        | <0.0001    |                            |
| <b>Prior CVD</b>                        |                    |                 |                          |                    |                 |                          |                          |            | <0.0001                    |
| No                                      | 78,951             | 2,010,555       | 3.93                     | 57,480             | 637,568         | 9.02                     | 1.48 (1.45, 1.51)        | <0.0001    |                            |
| Yes                                     | 182,294            | 1,239,605       | 14.71                    | 210,349            | 677,175         | 31.06                    | 1.41 (1.39, 1.43)        | <0.0001    |                            |
| <b># of CVD risk factors</b>            |                    |                 |                          |                    |                 |                          |                          |            | <0.0001                    |
| <3                                      | 101,518            | 1,875,800       | 5.41                     | 69,903             | 549,927         | 12.71                    | 1.41 (1.39, 1.44)        | <0.0001    |                            |
| 3+                                      | 159,727            | 1,374,360       | 11.62                    | 197,926            | 764,815         | 25.88                    | 1.44 (1.42, 1.46)        | <0.0001    |                            |
| <b>ICU during index hospitalization</b> |                    |                 |                          |                    |                 |                          |                          |            | <0.0001                    |
| No                                      | 155,273            | 2,324,377       | 6.68                     | 137,926            | 779,891         | 17.69                    | 1.43 (1.41, 1.45)        | <0.0001    |                            |
| Yes                                     | 105,972            | 925,783         | 11.45                    | 129,903            | 534,851         | 24.29                    | 1.39 (1.36, 1.42)        | <0.0001    |                            |

|                                                       |         |           |       |         |           |       |                   |                   |  |
|-------------------------------------------------------|---------|-----------|-------|---------|-----------|-------|-------------------|-------------------|--|
| <b>CVD diagnosis during index hospitalization</b>     |         |           |       |         |           |       |                   | <b>&lt;0.0001</b> |  |
| No                                                    | 66,913  | 2,010,432 | 3.33  | 67,654  | 709,162   | 9.54  | 1.51 (1.48, 1.54) | <b>&lt;0.0001</b> |  |
| Yes                                                   | 194,332 | 1,239,728 | 15.68 | 200,175 | 605,580   | 33.06 | 1.38 (1.36, 1.40) | <b>&lt;0.0001</b> |  |
| <b>Any organ failure during index hospitalization</b> |         |           |       |         |           |       |                   | <b>&lt;0.0001</b> |  |
| No                                                    | 181,765 | 2,617,466 | 6.94  | 27,878  | 243,137   | 11.47 | 1.35 (1.33, 1.37) | <b>&lt;0.0001</b> |  |
| Yes                                                   | 79,480  | 632,694   | 12.56 | 239,951 | 1,071,605 | 22.39 | 1.52 (1.43, 1.62) | <b>&lt;0.0001</b> |  |
| <b>AKI during index hospitalization</b>               |         |           |       |         |           |       |                   | <b>&lt;0.0001</b> |  |
| No                                                    | 224,763 | 3,016,407 | 7.45  | 140,743 | 806,814   | 17.44 | 1.50 (1.48, 1.51) | <b>&lt;0.0001</b> |  |
| Yes                                                   | 36,482  | 233,753   | 15.61 | 127,086 | 507,928   | 25.02 | 1.52 (1.38, 1.67) | <b>&lt;0.0001</b> |  |
| <b>Shock during index hospitalization</b>             |         |           |       |         |           |       |                   | <b>&lt;0.0001</b> |  |
| No                                                    | 259,601 | 3,237,222 | 8.02  | 250,427 | 1,231,974 | 20.33 | 1.59 (1.57, 1.60) | <b>&lt;0.0001</b> |  |
| Yes                                                   | 1,644   | 12,938    | 12.71 | 17,402  | 82,768    | 21.03 | 1.34 (1.02, 1.76) | <b>0.0366</b>     |  |
| <b>Prior hospitalization within 6 months</b>          |         |           |       |         |           |       |                   | <b>&lt;0.0001</b> |  |
| No                                                    | 223,079 | 2,939,026 | 7.59  | 175,757 | 1,035,258 | 16.98 | 1.54 (1.52, 1.55) | <b>&lt;0.0001</b> |  |
| Yes                                                   | 38,166  | 311,134   | 12.27 | 92,072  | 279,484   | 32.94 | 1.73 (1.70, 1.77) | <b>&lt;0.0001</b> |  |



**Table S13:** Risk of the composite of all-cause death and all-cause hospitalization associated with sepsis (all definitions) across subgroups. P values for interaction are unadjusted.

|                                         | No Sepsis (ref)    |                 |                          | Sepsis             |                 |                          | Hazard Ratio<br>(95% CI) | P<br>Value | P Value for<br>interaction |
|-----------------------------------------|--------------------|-----------------|--------------------------|--------------------|-----------------|--------------------------|--------------------------|------------|----------------------------|
|                                         | No. with<br>Events | Person<br>Years | Event<br>Rate per<br>100 | No. with<br>Events | Person<br>Years | Event<br>Rate per<br>100 |                          |            |                            |
| <b>Age group</b>                        |                    |                 |                          |                    |                 |                          |                          |            | <0.0001                    |
| All <65 years                           | 291,368            | 1,498,742       | 19.44                    | 157,129            | 366,018         | 42.93                    | 1.41 (1.39, 1.43)        | <0.0001    |                            |
| 65+ years                               | 370,101            | 990,179         | 37.38                    | 381,099            | 535,967         | 71.10                    | 1.31 (1.30, 1.32)        | <0.0001    |                            |
| 50-64 years                             | 193,140            | 910,128         | 21.22                    | 120,553            | 263,050         | 45.83                    | 1.41 (1.39, 1.43)        | <0.0001    |                            |
| <50 years                               | 98,228             | 588,614         | 16.69                    | 36,576             | 102,968         | 35.52                    | 1.43 (1.40, 1.46)        | <0.0001    |                            |
| <b>Sex</b>                              |                    |                 |                          |                    |                 |                          |                          |            | <0.0001                    |
| Male                                    | 302,445            | 1,110,995       | 27.22                    | 245,964            | 408,805         | 60.17                    | 1.36 (1.35, 1.38)        | <0.0001    |                            |
| Female                                  | 359,024            | 1,377,925       | 26.06                    | 292,264            | 493,180         | 59.26                    | 1.33 (1.32, 1.34)        | <0.0001    |                            |
| <b>Race/Ethnicity</b>                   |                    |                 |                          |                    |                 |                          |                          |            | <0.0001                    |
| Asian                                   | 11,681             | 55,156          | 21.18                    | 9,447              | 18,533          | 50.97                    | 1.37 (1.30, 1.44)        | <0.0001    |                            |
| Black                                   | 84,494             | 279,093         | 30.27                    | 78,071             | 112,682         | 69.28                    | 1.36 (1.34, 1.39)        | <0.0001    |                            |
| Hispanic                                | 43,504             | 180,242         | 24.14                    | 35,161             | 63,544          | 55.33                    | 1.34 (1.31, 1.38)        | <0.0001    |                            |
| White                                   | 425,411            | 1,512,053       | 28.13                    | 356,315            | 584,355         | 60.98                    | 1.33 (1.32, 1.34)        | <0.0001    |                            |
| All non-white                           | 236,058            | 976,867         | 24.16                    | 181,913            | 317,631         | 57.27                    | 1.38 (1.36, 1.39)        | <0.0001    |                            |
| <b>Health plan</b>                      |                    |                 |                          |                    |                 |                          |                          |            | <0.0001                    |
| Commercial                              | 274,975            | 1,476,499       | 18.62                    | 131,862            | 343,381         | 38.40                    | 1.40 (1.39, 1.42)        | <0.0001    |                            |
| Medicare Advantage                      | 386,464            | 1,012,422       | 38.17                    | 406,366            | 558,604         | 72.75                    | 1.31 (1.30, 1.33)        | <0.0001    |                            |
| <b>Pharmacy coverage</b>                |                    |                 |                          |                    |                 |                          |                          |            | 0.0021                     |
| No                                      | 197,504            | 872,619         | 22.63                    | 128,428            | 256,588         | 50.05                    | 1.36 (1.34, 1.37)        | <0.0001    |                            |
| Yes                                     | 463,965            | 1,616,302       | 28.71                    | 409,800            | 645,397         | 63.50                    | 1.34 (1.33, 1.35)        | <0.0001    |                            |
| <b>Prior CVD</b>                        |                    |                 |                          |                    |                 |                          |                          |            | 0.0684                     |
| No                                      | 311,293            | 1,529,893       | 20.35                    | 172,568            | 436,839         | 39.50                    | 1.34 (1.33, 1.35)        | <0.0001    |                            |
| Yes                                     | 350,176            | 959,028         | 36.51                    | 365,660            | 465,147         | 78.61                    | 1.34 (1.33, 1.36)        | <0.0001    |                            |
| <b># of CVD risk factors</b>            |                    |                 |                          |                    |                 |                          |                          |            | <0.0001                    |
| <3                                      | 313,403            | 1,448,908       | 21.63                    | 174,566            | 384,889         | 45.35                    | 1.32 (1.30, 1.33)        | <0.0001    |                            |
| 3+                                      | 348,066            | 1,040,012       | 33.47                    | 363,662            | 517,096         | 70.33                    | 1.38 (1.36, 1.39)        | <0.0001    |                            |
| <b>ICU during index hospitalization</b> |                    |                 |                          |                    |                 |                          |                          |            | <0.0001                    |
| No                                      | 453,740            | 1,740,894       | 26.06                    | 295,253            | 529,558         | 55.75                    | 1.33 (1.31, 1.34)        | <0.0001    |                            |
| Yes                                     | 207,729            | 748,027         | 27.77                    | 242,975            | 372,427         | 65.24                    | 1.33 (1.32, 1.35)        | <0.0001    |                            |

|                                                       |         |           |       |         |         |        |                   |         |  |
|-------------------------------------------------------|---------|-----------|-------|---------|---------|--------|-------------------|---------|--|
| <b>CVD diagnosis during index hospitalization</b>     |         |           |       |         |         |        |                   | <0.0001 |  |
| No                                                    | 327,156 | 1,471,436 | 22.23 | 210,233 | 463,330 | 45.37  | 1.36 (1.35, 1.37) | <0.0001 |  |
| Yes                                                   | 334,313 | 1,017,485 | 32.86 | 327,995 | 438,654 | 74.77  | 1.30 (1.29, 1.31) | <0.0001 |  |
| <b>Any organ failure during index hospitalization</b> |         |           |       |         |         |        |                   | <0.0001 |  |
| No                                                    | 488,007 | 1,993,195 | 24.48 | 67,929  | 170,660 | 39.80  | 1.30 (1.29, 1.31) | <0.0001 |  |
| Yes                                                   | 173,462 | 495,726   | 34.99 | 470,299 | 731,326 | 64.31  | 1.29 (1.23, 1.35) | <0.0001 |  |
| <b>AKI during index hospitalization</b>               |         |           |       |         |         |        |                   | <0.0001 |  |
| No                                                    | 587,731 | 2,304,326 | 25.51 | 302,186 | 554,121 | 54.53  | 1.49 (1.48, 1.50) | <0.0001 |  |
| Yes                                                   | 73,738  | 184,595   | 39.95 | 236,042 | 347,864 | 67.85  | 1.33 (1.23, 1.43) | <0.0001 |  |
| <b>Shock during index hospitalization</b>             |         |           |       |         |         |        |                   | <0.0001 |  |
| No                                                    | 657,871 | 2,478,483 | 26.54 | 500,061 | 845,574 | 59.14  | 1.52 (1.51, 1.53) | <0.0001 |  |
| Yes                                                   | 3,598   | 10,437    | 34.47 | 38,167  | 56,411  | 67.66  | 1.35 (1.14, 1.59) | 0.0004  |  |
| <b>Prior hospitalization within 6 months</b>          |         |           |       |         |         |        |                   | <0.0001 |  |
| No                                                    | 567,958 | 2,276,337 | 24.95 | 361,651 | 738,119 | 49.00  | 1.48 (1.47, 1.49) | <0.0001 |  |
| Yes                                                   | 93,511  | 212,583   | 43.99 | 176,577 | 163,867 | 107.76 | 1.71 (1.69, 1.74) | <0.0001 |  |

**Table S14:** Risk of the composite of all-cause death and cardiovascular hospitalization associated with sepsis (all definitions) across subgroups. P values for interaction are unadjusted.

|                                         | No Sepsis (ref)    |                 |                          | Sepsis             |                 |                          | Hazard Ratio<br>(95% CI) | P<br>Value | P Value for<br>interaction |
|-----------------------------------------|--------------------|-----------------|--------------------------|--------------------|-----------------|--------------------------|--------------------------|------------|----------------------------|
|                                         | No. with<br>Events | Person<br>Years | Event<br>Rate per<br>100 | No. with<br>Events | Person<br>Years | Event<br>Rate per<br>100 |                          |            |                            |
| <b>Age group</b>                        |                    |                 |                          |                    |                 |                          |                          |            | <0.0001                    |
| All <65 years                           | 98,844             | 1,968,649       | 5.02                     | 78,840             | 547,440         | 14.40                    | 1.61 (1.58, 1.65)        | <0.0001    |                            |
| 65+ years                               | 261,559            | 1,281,510       | 20.41                    | 298,674            | 767,302         | 38.93                    | 1.30 (1.29, 1.32)        | <0.0001    |                            |
| 50-64 years                             | 77,651             | 1,186,143       | 6.55                     | 65,311             | 391,200         | 16.70                    | 1.65 (1.62, 1.69)        | <0.0001    |                            |
| <50 years                               | 21,193             | 782,506         | 2.71                     | 13,529             | 156,240         | 8.66                     | 1.65 (1.58, 1.72)        | <0.0001    |                            |
| <b>Sex</b>                              |                    |                 |                          |                    |                 |                          |                          |            | <0.0001                    |
| Male                                    | 179,941            | 1,411,355       | 12.75                    | 177,166            | 581,976         | 30.44                    | 1.38 (1.36, 1.40)        | <0.0001    |                            |
| Female                                  | 180,462            | 1,838,805       | 9.81                     | 200,348            | 732,766         | 27.34                    | 1.36 (1.34, 1.37)        | <0.0001    |                            |
| <b>Race/Ethnicity</b>                   |                    |                 |                          |                    |                 |                          |                          |            | <0.0001                    |
| Asian                                   | 6,266              | 68,998          | 9.08                     | 6,615              | 25,831          | 25.61                    | 1.34 (1.24, 1.44)        | <0.0001    |                            |
| Black                                   | 48,976             | 365,637         | 13.39                    | 57,135             | 166,599         | 34.29                    | 1.37 (1.34, 1.41)        | <0.0001    |                            |
| Hispanic                                | 21,603             | 232,796         | 9.28                     | 23,398             | 90,771          | 25.78                    | 1.33 (1.28, 1.38)        | <0.0001    |                            |
| White                                   | 243,636            | 1,986,376       | 12.27                    | 255,958            | 856,362         | 29.89                    | 1.35 (1.33, 1.36)        | <0.0001    |                            |
| All non-white                           | 116,767            | 1,263,784       | 9.24                     | 121,556            | 458,381         | 26.52                    | 1.41 (1.39, 1.43)        | <0.0001    |                            |
| <b>Health plan</b>                      |                    |                 |                          |                    |                 |                          |                          |            | <0.0001                    |
| Commercial                              | 92,971             | 1,908,542       | 4.87                     | 62,512             | 492,057         | 12.70                    | 1.60 (1.57, 1.63)        | <0.0001    |                            |
| Medicare Advantage                      | 267,432            | 1,341,618       | 19.93                    | 315,002            | 822,685         | 38.29                    | 1.30 (1.29, 1.32)        | <0.0001    |                            |
| <b>Pharmacy coverage</b>                |                    |                 |                          |                    |                 |                          |                          |            | 0.2842                     |
| No                                      | 97,088             | 1,139,965       | 8.52                     | 84,099             | 370,641         | 22.69                    | 1.38 (1.35, 1.40)        | <0.0001    |                            |
| Yes                                     | 263,315            | 2,110,194       | 12.48                    | 293,415            | 944,101         | 31.08                    | 1.36 (1.35, 1.38)        | <0.0001    |                            |
| <b>Prior CVD</b>                        |                    |                 |                          |                    |                 |                          |                          |            | <0.0001                    |
| No                                      | 119,463            | 2,010,555       | 5.94                     | 91,352             | 637,568         | 14.33                    | 1.42 (1.40, 1.45)        | <0.0001    |                            |
| Yes                                     | 240,940            | 1,239,605       | 19.44                    | 286,162            | 677,175         | 42.26                    | 1.33 (1.32, 1.35)        | <0.0001    |                            |
| <b># of CVD risk factors</b>            |                    |                 |                          |                    |                 |                          |                          |            | <0.0001                    |
| <3                                      | 149,962            | 1,875,800       | 7.99                     | 111,142            | 549,927         | 20.21                    | 1.34 (1.32, 1.36)        | <0.0001    |                            |
| 3+                                      | 210,441            | 1,374,360       | 15.31                    | 266,372            | 764,815         | 34.83                    | 1.39 (1.37, 1.41)        | <0.0001    |                            |
| <b>ICU during index hospitalization</b> |                    |                 |                          |                    |                 |                          |                          |            | <0.0001                    |
| No                                      | 225,733            | 2,324,377       | 9.71                     | 199,256            | 779,891         | 25.55                    | 1.35 (1.34, 1.37)        | <0.0001    |                            |
| Yes                                     | 134,670            | 925,783         | 14.55                    | 178,258            | 534,851         | 33.33                    | 1.33 (1.31, 1.35)        | <0.0001    |                            |

|                                                       |         |           |       |         |           |       |                   |         |  |
|-------------------------------------------------------|---------|-----------|-------|---------|-----------|-------|-------------------|---------|--|
| <b>CVD diagnosis during index hospitalization</b>     |         |           |       |         |           |       |                   | <0.0001 |  |
| No                                                    | 113,795 | 2,010,432 | 5.66  | 112,143 | 709,162   | 15.81 | 1.46 (1.43, 1.48) | <0.0001 |  |
| Yes                                                   | 246,608 | 1,239,728 | 19.89 | 265,371 | 605,580   | 43.82 | 1.29 (1.28, 1.31) | <0.0001 |  |
| <b>Any organ failure during index hospitalization</b> |         |           |       |         |           |       |                   | 0.0003  |  |
| No                                                    | 246,419 | 2,617,466 | 9.41  | 38,381  | 243,137   | 15.79 | 1.32 (1.31, 1.34) | <0.0001 |  |
| Yes                                                   | 113,984 | 632,694   | 18.02 | 339,133 | 1,071,605 | 31.65 | 1.28 (1.21, 1.35) | <0.0001 |  |
| <b>AKI during index hospitalization</b>               |         |           |       |         |           |       |                   | <0.0001 |  |
| No                                                    | 309,359 | 3,016,407 | 10.26 | 203,143 | 806,814   | 25.18 | 1.61 (1.60, 1.62) | <0.0001 |  |
| Yes                                                   | 51,044  | 233,753   | 21.84 | 174,371 | 507,928   | 34.33 | 1.35 (1.23, 1.47) | <0.0001 |  |
| <b>Shock during index hospitalization</b>             |         |           |       |         |           |       |                   | 0.0107  |  |
| No                                                    | 357,892 | 3,237,222 | 11.06 | 349,974 | 1,231,974 | 28.41 | 1.67 (1.66, 1.69) | <0.0001 |  |
| Yes                                                   | 2,511   | 12,938    | 19.41 | 27,540  | 82,768    | 33.27 | 1.27 (1.04, 1.56) | 0.0220  |  |
| <b>Prior hospitalization within 6 months</b>          |         |           |       |         |           |       |                   | <0.0001 |  |
| No                                                    | 357,916 | 3,237,374 | 11.06 | 359,351 | 1,258,655 | 28.55 | 1.67 (1.66, 1.69) | <0.0001 |  |
| Yes                                                   | 2,487   | 12,786    | 19.45 | 18,163  | 56,087    | 32.38 | 1.32 (1.06, 1.64) | 0.0129  |  |

**Table S15.** Risk of each of the outcomes of interest associated with sepsis (all definitions) across subgroups defined by the presence of any infection and by the most common infection subtypes. P values for interaction are unadjusted.

|                                                      | No Sepsis (ref)    |                 |                          | Sepsis             |                 |                          | Hazard Ratio<br>(95% CI) | P<br>Value | P Value<br>for<br>interaction |
|------------------------------------------------------|--------------------|-----------------|--------------------------|--------------------|-----------------|--------------------------|--------------------------|------------|-------------------------------|
|                                                      | No. with<br>Events | Person<br>Years | Event<br>Rate per<br>100 | No. with<br>Events | Person<br>Years | Event<br>Rate per<br>100 |                          |            |                               |
| <b>Infection during index hospitalization</b>        |                    |                 |                          |                    |                 |                          |                          |            |                               |
| <b>No infection</b>                                  | <b>N=1,114,981</b> |                 |                          | <b>N=7,174</b>     |                 |                          |                          |            |                               |
| Mortality                                            | 130,463            | 2,818,188       | 4.63                     | 1,457              | 21,570          | 6.75                     | 1.12 (1.06, 1.17)        | <0.0001    | <0.0001                       |
| All-cause hospitalization                            | 466,191            | 1,894,523       | 24.61                    | 4,194              | 11,541          | 36.34                    | 1.39 (1.34, 1.43)        | <0.0001    | <0.0001                       |
| CVD hospitalization                                  | 210,481            | 2,451,875       | 8.58                     | 2,559              | 16,111          | 15.88                    | 1.68 (1.61, 1.75)        | <0.0001    | <0.0001                       |
| Death or all-cause hospitalization                   | 510,098            | 1,894,523       | 26.92                    | 4,467              | 11,541          | 38.71                    | 1.30 (1.26, 1.34)        | <0.0001    | <0.0001                       |
| Death or CVD hospitalization                         | 286,597            | 2,451,875       | 11.69                    | 3,121              | 16,111          | 19.37                    | 1.42 (1.37, 1.47)        | <0.0001    | <0.0001                       |
| <b>Any infection</b>                                 | <b>N=334,840</b>   |                 |                          | <b>N=801,499</b>   |                 |                          |                          |            |                               |
| Mortality                                            | 37,030             | 883,335         | 4.19                     | 218,971            | 1,672,957       | 13.09                    | 1.35 (1.33, 1.37)        | <0.0001    | <0.0001                       |
| All-cause hospitalization                            | 138,660            | 594,397         | 23.33                    | 477,069            | 890,445         | 53.58                    | 1.34 (1.33, 1.35)        | <0.0001    | 0.0251                        |
| CVD hospitalization                                  | 50,764             | 798,285         | 6.36                     | 265,270            | 1,298,631       | 20.43                    | 1.38 (1.36, 1.40)        | <0.0001    | 0.0488                        |
| Death or all-cause hospitalization                   | 151,371            | 594,397         | 25.47                    | 533,761            | 890,445         | 59.94                    | 1.31 (1.30, 1.33)        | <0.0001    | 0.0018                        |
| Death or CVD hospitalization                         | 73,806             | 798,285         | 9.25                     | 374,393            | 1,298,631       | 28.83                    | 1.35 (1.34, 1.37)        | <0.0001    | 0.3253                        |
| <b>Pulmonary</b>                                     | <b>N=61,653</b>    |                 |                          | <b>N=177,274</b>   |                 |                          |                          |            |                               |
| Mortality                                            | 9,919              | 138,737         | 7.15                     | 55,118             | 352,335         | 15.64                    | 1.17 (1.07, 1.27)        | 0.0004     |                               |
| All-cause hospitalization                            | 26,671             | 94,698          | 28.16                    | 111,620            | 178,787         | 62.43                    | 1.39 (1.33, 1.46)        | <0.0001    |                               |
| CVD hospitalization                                  | 12,752             | 120,380         | 10.59                    | 70,233             | 255,750         | 27.46                    | 1.38 (1.29, 1.48)        | <0.0001    |                               |
| Death or all-cause hospitalization                   | 29,933             | 94,698          | 31.61                    | 124,444            | 178,787         | 69.60                    | 1.31 (1.25, 1.38)        | <0.0001    |                               |
| Death or CVD hospitalization                         | 18,651             | 120,380         | 15.49                    | 94,685             | 255,750         | 37.02                    | 1.26 (1.19, 1.34)        | <0.0001    |                               |
| <b>Bacterial/fungal/iatrogenic/sepsis/bacteremia</b> | <b>N=44,498</b>    |                 |                          | <b>N=175,142</b>   |                 |                          |                          |            |                               |
| Mortality                                            | 4,109              | 120,625         | 3.41                     | 42,583             | 370,595         | 11.49                    | 1.68 (1.62, 1.75)        | <0.0001    |                               |
| All-cause hospitalization                            | 17,606             | 82,880          | 21.24                    | 100,380            | 202,990         | 49.45                    | 1.46 (1.43, 1.49)        | <0.0001    |                               |
| CVD hospitalization                                  | 5,745              | 110,198         | 5.21                     | 50,083             | 298,827         | 16.76                    | 1.54 (1.49, 1.59)        | <0.0001    |                               |
| Death or all-cause hospitalization                   | 19,002             | 82,880          | 22.93                    | 112,058            | 202,990         | 55.20                    | 1.46 (1.43, 1.49)        | <0.0001    |                               |
| Death or CVD hospitalization                         | 8,450              | 110,198         | 7.67                     | 73,041             | 298,827         | 24.44                    | 1.58 (1.54, 1.63)        | <0.0001    |                               |
| <b>Genitourinary</b>                                 | <b>N=53,178</b>    |                 |                          | <b>N=109,157</b>   |                 |                          |                          |            |                               |
| Mortality                                            | 8,981              | 133,353         | 6.73                     | 35,788             | 223,271         | 16.03                    | 1.11 (1.03, 1.20)        | 0.0088     |                               |
| All-cause hospitalization                            | 23,478             | 86,849          | 27.03                    | 68,371             | 112,441         | 60.81                    | 1.34 (1.28, 1.41)        | <0.0001    |                               |
| CVD hospitalization                                  | 9,410              | 117,945         | 7.98                     | 40,115             | 166,706         | 24.06                    | 1.44 (1.34, 1.54)        | <0.0001    |                               |

## Sepsis and cardiovascular events

|                                    |        |                  |       |         |                  |       |                   |         |
|------------------------------------|--------|------------------|-------|---------|------------------|-------|-------------------|---------|
| Death or all-cause hospitalization | 27,046 | 86,849           | 31.14 | 78,044  | 112,441          | 69.41 | 1.25 (1.20, 1.31) | <0.0001 |
| Death or CVD hospitalization       | 15,333 | 117,945          | 13.00 | 58,145  | 166,706          | 34.88 | 1.23 (1.17, 1.31) | <0.0001 |
| <b>Multiple</b>                    |        | <b>N=59,250</b>  |       |         | <b>N=267,444</b> |       |                   |         |
| Mortality                          | 6,789  | 159,187          | 4.26  | 69,181  | 559,739          | 12.36 | 1.26 (1.22, 1.30) | <0.0001 |
| All-cause hospitalization          | 24,138 | 108,199          | 22.31 | 152,437 | 309,456          | 49.26 | 1.36 (1.34, 1.39) | <0.0001 |
| CVD hospitalization                | 8,374  | 145,144          | 5.77  | 79,814  | 448,743          | 17.79 | 1.49 (1.45, 1.53) | <0.0001 |
| Death or all-cause hospitalization | 26,628 | 108,199          | 24.61 | 171,785 | 309,456          | 55.51 | 1.32 (1.30, 1.34) | <0.0001 |
| Death or CVD hospitalization       | 12,816 | 145,144          | 8.83  | 116,752 | 448,743          | 26.02 | 1.37 (1.34, 1.41) | <0.0001 |
| <b>Other</b>                       |        | <b>N=116,261</b> |       |         | <b>N=72,482</b>  |       |                   |         |
| Mortality                          | 7,232  | 331,433          | 2.18  | 16,301  | 167,017          | 9.76  | 1.40 (1.27, 1.54) | <0.0001 |
| All-cause hospitalization          | 46,767 | 221,772          | 21.09 | 44,261  | 86,771           | 51.01 | 1.30 (1.24, 1.35) | <0.0001 |
| CVD hospitalization                | 14,483 | 304,618          | 4.75  | 25,025  | 128,604          | 19.46 | 1.48 (1.39, 1.58) | <0.0001 |
| Death or all-cause hospitalization | 48,762 | 221,772          | 21.99 | 47,430  | 86,771           | 54.66 | 1.29 (1.24, 1.35) | <0.0001 |
| Death or CVD hospitalization       | 18,556 | 304,618          | 6.09  | 31,770  | 128,604          | 24.70 | 1.45 (1.37, 1.54) | <0.0001 |

**Figure S1.** Flow chart demonstrating study inclusion/exclusion criteria and sepsis groups. *Abbreviations: CVD, cardiovascular disease; DRG, Disease-Related Group; LOS, length of stay; OLDW, OptumLabs® Data Warehouse*

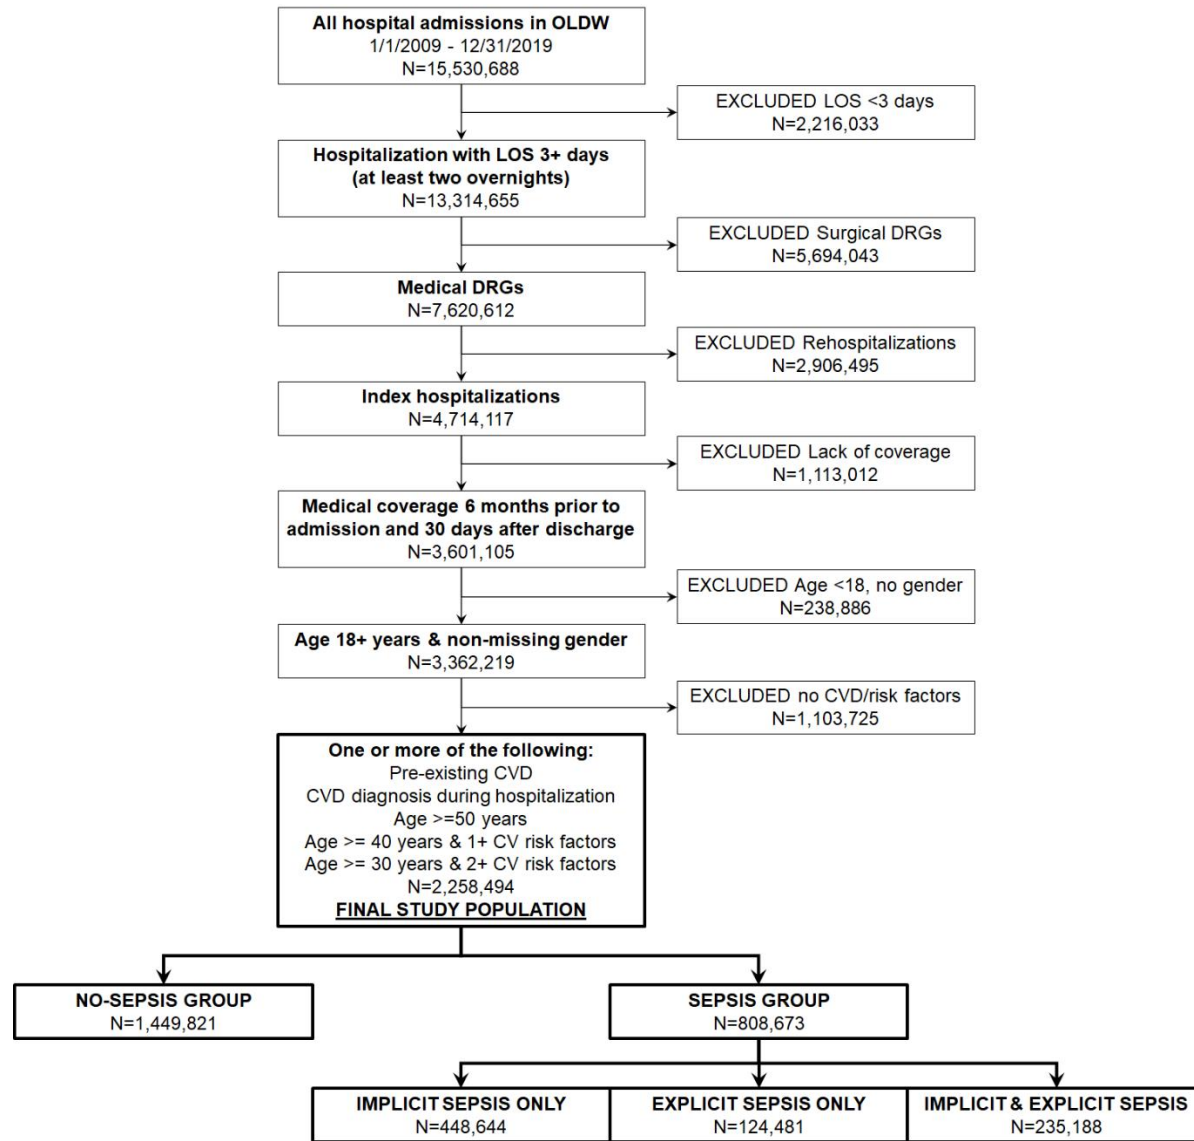

Supplement: JAH3-12-e027813-s001.pdf [file JAH3-12-e027813-s001.pdf]
